# Supplementary material for: Subclinical Propionibacterium acnes infection estimation in the intervertebral disc (SPInE-ID): protocol for a prospective cohort
Source: PubMed Central journal article supplement — BMJ Open. 2017 Nov 17;7(11):e017930. doi: 10.1136/bmjopen-2017-017930 (PMC5701985; doi:10.1136/bmjopen-2017-017930), 2017-11-17
Supplement: bmjopen-2017-017930.draft_revisions.pdf [file bmjopen-2017-017930.draft_revisions.pdf]

# BMJ Open

BMJ Open is committed to open peer review. As part of this commitment we make the peer review history of every article we publish publicly available.

When an article is published we post the peer reviewers' comments and the authors' responses online. We also post the versions of the paper that were used during peer review. These are the versions that the peer review comments apply to.

The versions of the paper that follow are the versions that were submitted during the peer review process. They are not the versions of record or the final published versions. They should not be cited or distributed as the published version of this manuscript.

BMJ Open is an open access journal and the full, final, typeset and author-corrected version of record of the manuscript is available on our site with no access controls, subscription charges or pay-per-view fees (<http://bmjopen.bmj.com>).

If you have any questions on BMJ Open's open peer review process please email [editorial.bmjopen@bmj.com](mailto:editorial.bmjopen@bmj.com)

# BMJ Open

## Subclinical Propionibacterium Acnes Infection Estimation in the Intervertebral Disc (SPInE-ID): Protocol for a Prospective Cohort.

|                                 |                                                                                                                                                                                                                                                                                                                                                                                                                                                                                                                                                                                                                                                                                                                                                                                                                                                                                                                                                                                                                                                                                                                                                       |
|---------------------------------|-------------------------------------------------------------------------------------------------------------------------------------------------------------------------------------------------------------------------------------------------------------------------------------------------------------------------------------------------------------------------------------------------------------------------------------------------------------------------------------------------------------------------------------------------------------------------------------------------------------------------------------------------------------------------------------------------------------------------------------------------------------------------------------------------------------------------------------------------------------------------------------------------------------------------------------------------------------------------------------------------------------------------------------------------------------------------------------------------------------------------------------------------------|
| Journal:                        | <i>BMJ Open</i>                                                                                                                                                                                                                                                                                                                                                                                                                                                                                                                                                                                                                                                                                                                                                                                                                                                                                                                                                                                                                                                                                                                                       |
| Manuscript ID                   | bmjopen-2017-017930                                                                                                                                                                                                                                                                                                                                                                                                                                                                                                                                                                                                                                                                                                                                                                                                                                                                                                                                                                                                                                                                                                                                   |
| Article Type:                   | Protocol                                                                                                                                                                                                                                                                                                                                                                                                                                                                                                                                                                                                                                                                                                                                                                                                                                                                                                                                                                                                                                                                                                                                              |
| Date Submitted by the Author:   | 25-May-2017                                                                                                                                                                                                                                                                                                                                                                                                                                                                                                                                                                                                                                                                                                                                                                                                                                                                                                                                                                                                                                                                                                                                           |
| Complete List of Authors:       | <p>Astur, Nelson; Hospital Israelita Albert Einstein, Programa Locomotor Martins, Delio; Hospital Israelita Albert Einstein, Programa Locomotor Wajchenberg, Marcelo; Hospital Israelita Albert Einstein, Programa Locomotor</p> <p>Ferreti, Mario; Hospital Israelita Albert Einstein, Programa Locomotor Menezes, Fernando; Hospital Israelita Albert Einstein, Serviço de Controle de Infecção Hospitalar</p> <p>Doi, Andre; Hospital Israelita Albert Einstein, Setor de Microbiologia do Laboratório Clínico</p> <p>Rosemberg, Laercio; Hospital Israelita Albert Einstein, Departamento de Diagnostico por Imagem</p> <p>Santos, Durval; Hospital Israelita Albert Einstein, Departamento de Diagnostico por Imagem</p> <p>Iutaka, Alexandre; Hospital Israelita Albert Einstein, Programa Locomotor Rodrigues, Luciano; Hospital Israelita Albert Einstein, Programa Locomotor Poetscher, Arthur; Hospital Israelita Albert Einstein, Programa Locomotor Martino, Marines; Hospital Israelita Albert Einstein, Serviço de Microbiologia do Laboratorio Clinico</p> <p>Lenza, Mario; Hospital Israelita Albert Einstein, Programa Locomotor</p> |
| <b>Primary Subject Heading</b>: | Surgery                                                                                                                                                                                                                                                                                                                                                                                                                                                                                                                                                                                                                                                                                                                                                                                                                                                                                                                                                                                                                                                                                                                                               |
| Secondary Subject Heading:      | Infectious diseases, Radiology and imaging                                                                                                                                                                                                                                                                                                                                                                                                                                                                                                                                                                                                                                                                                                                                                                                                                                                                                                                                                                                                                                                                                                            |
| Keywords:                       | Spine < ORTHOPAEDIC & TRAUMA SURGERY, Magnetic resonance imaging < RADIOLOGY & IMAGING, Diagnostic microbiology < INFECTIOUS DISEASES, Propionibacterium acnes, Low back pain                                                                                                                                                                                                                                                                                                                                                                                                                                                                                                                                                                                                                                                                                                                                                                                                                                                                                                                                                                         |
|                                 |                                                                                                                                                                                                                                                                                                                                                                                                                                                                                                                                                                                                                                                                                                                                                                                                                                                                                                                                                                                                                                                                                                                                                       |

SCHOLARONE™  
Manuscripts

1  
2  
3 **Subclinical *Propionibacterium acnes* Infection Estimation in the Intervertebral**  
4 **Disc (SPInE-ID): Protocol for a Prospective Cohort**  
5

6 Nelson Astur, MD, MSc  
7 Delio E. Martins, MD, PhD  
8 Marcelo Wajchenberg, MD, PhD  
9 Mario Ferreti, MD, PhD  
10 Fernando G. Menezes, MD  
11 Andre M. Doi, MD  
12 Laercio A. Rosemberg, MD, PhD  
13 Durval C. B. Santos, MD  
14 Alexandre S. Iutaka, MD  
15 Luciano M. R. Rodrigues, MD, PhD  
16 Arthur W. Poetscher, MD, MSc  
17 Marines D. V. Martino, MD, PhD  
18 Mario Lenza, MD, PhD

19  
20  
21  
22 Hospital Israelita Albert Einstein  
23 Sao Paulo, SP - Brazil  
24

25  
26 **Corresponding Author:**

27 Nelson Astur, MD, MSc  
28 Hospital Israelita Albert Einstein  
29 Bloco A1 – Sala 306  
30 Av. Albert Einstein, 627  
31 Morumbi - CEP 05652- 900  
32 Sao Paulo, SP – Brazil  
33 [nelson.astur@einstein.br](mailto:nelson.astur@einstein.br)  
34 +55 11 21519393  
35

36  
37 **Funding statement:** This work will be supported by FAPESP (Fundação de Amparo à  
38 Pesquisa do Estado de São Paulo) grant number 2016/15830-7  
39

40 **Competing interests statement:** Authors have no potential conflict of interests.  
41  
42  
43  
44  
45  
46  
47  
48  
49  
50  
51  
52  
53  
54  
55  
56  
57  
58  
59  
60

## ABSTRACT

### Introduction

Low back pain is a frequent condition in the population, as well as vertebral endplates abnormalities. Subclinical infection caused by low-virulence pathogen can possibly lead to vertebral endplate abnormalities, detected in magnetic resonance imaging (MRI) studies, and differentiation between infection and endplate changes may be difficult. Subclinical infection of the disc can also be associated with increasing low back pain and *Propionibacterium acnes* has been related to sciatica. Main purpose of this study is to identify if the presence of an infection pathogen in the intervertebral disc is real or if it is intraoperative contamination, and if it correlates to endplate abnormalities.

### Methods and analysis

An open prospective cohort study will be performed at a single center. Subjects between 18 and 65 years of age; both genders; with diagnose of lumbar disc herniation undergoing open decompression surgery (microdiscectomy) will be included. Excised herniated disc fragment, muscle and ligamentum flavum samples will be collected during surgery and immediately sent to microbiology for tissue culture and search for pathogens. Score questionnaires for pain, function and quality of life will be applied before surgery and at 1, 3, 6 and 12 months time-points. A new MRI will be performed 12 months after surgery for analysis of Modic changes and baseline comparison. Primary endpoint is real rate of disc infection in symptomatic patients with degenerative disc disease. Secondary endpoints will be low back pain, quality of life, function, Modic incidence and volume.

### Ethics and dissemination

This study is going to be submitted to our Institutional Review Board and will only begin after its approval. Patients accepting to participate will sign an Informed Consent Form before entering the study. Results will be published in a peer reviewed medical journal and presented in medical conferences independently of study findings.

**Registration** ClinicalTrials.gov NCT0315876

## INTRODUCTION

Low back pain is a frequent condition in the population, as well as vertebral endplates abnormalities, described by Modic et al.<sup>1,2</sup>, that affect up to 6% of the general population, and, up to 46% of patients with low back pain<sup>3</sup>. Modic type I changes are described as vertebral bone marrow edema related to acute low back pain<sup>4</sup>. When Modic changes are detected, chances of one presenting unspecific low back pain are 4.5 times higher<sup>1,2</sup>.

Subclinical infection caused by low-virulence pathogen can possibly lead to vertebral endplate abnormalities, detected in magnetic resonance imaging (MRI) studies, and differentiation between infection and Modic changes may be difficult<sup>5,6</sup>. Subclinical infection can also be associated with increasing low back pain<sup>7</sup>. Albert et al<sup>8</sup> reported 61 patients who had undergone surgical treatment for lumbar disc herniation where 46% of cases had a positive culture. The same authors also reported that 80% of patients with a positive culture for anaerobic pathogens presented Modic type I changes at the adjacent vertebra after a two-year follow-up, against 44% of patients with negative culture. Some studies demonstrated the presence of low-virulence pathogens in intervertebral disc tissue cultures<sup>6-10</sup>, most commonly reported to *Propionibacterium acnes*.

Chronic low back pain and Modic type I changes have been treated with antibiotics for up to 100 days with superior outcomes compared to sham treatment<sup>7</sup>. Patients were treated with amoxicillin/clavulanate (500mg/125mg)<sup>7</sup> based on the study where sciatica is associated with *Propionibacterium acnes*<sup>8</sup>.

However, Carricajo et al<sup>11</sup> suggest that the presence of *P. acnes* in the intervertebral discs is due to either external surgical or laboratory contamination. These authors detected positive disc culture in only 3.7% of cases out of 54 patients. Furthermore, same authors demonstrated that samples of spinal muscle and ligamentum *flavum* collected intraoperatively at the end of procedure had positive cultures in 14.8% of cases with a negative disc culture.

In agreement to that study, Rigal et al<sup>12</sup> analyzed a sample of 313 patients submitted to video assisted or retroperitoneal anterior approach and found only six cases of positive cultures. No correlation between infection and degeneration of the intervertebral disc was found.

Still, Rollason et al<sup>13</sup>, in a study of genotype characterization, observed that *P. acnes* cultured from disc samples surgically taken from 64 patients with disc herniation were different from those usually found on skin, suggesting that this pathogen could be related to low back pain.

A systematic review performed by Urquhart et al<sup>14</sup> concluded, that there is moderate evidence that a relationship between positive culture with Modic type I changes and low back pain exists, although there was low evidence for relationship of cause. For that, authors concluded that new studies should be made to determine whether pathogens in the disc are originated from external contamination or if they are truly involved in the development of chronic back pain.

## HYPOTHESIS

Lumbar disc herniation is related to subclinical infection of the intervertebral disc

1  
2  
3 **Null hypothesis:** incidence of subclinical infection is the same as incidence of  
4 cases without infection in patients with lumbar disc herniation treated with surgery.  
5

## 6 **OBJECTIVES**

7  
8  
9 Main purpose of this study is to identify if the presence of an infection pathogen  
10 in the intervertebral disc is real or if it is intraoperative contamination.

11 Secondary objectives are to analyze clinical prognostic factors in patients and  
12 diagnosis of infection. The study also proposes to analyze the relationship between  
13 radiological changes (Modic I and II) and infection.  
14

## 15 **JUSTIFICATION AND SCIENTIFIC CHALLENGES**

16  
17  
18 In case there is a confirmation that lumbar disc herniation is associated with  
19 subclinical pathogens as well as Modic changes with unspecific chronic back pain, it can  
20 change the way this affection is treated and improve treatment costs and outcomes.

21 Previously published studies that reported a strong correlation between *P. acnes*  
22 and low back pain and/or disc herniation are almost all from the same study group<sup>5-8</sup>.  
23 Few studies questioned their results, and those who did presented a small number of  
24 patients, and no adequate statistical methodology<sup>11</sup>.

25 For this prospective cohort study, we previously calculated minimum number of  
26 subjects needed for adequate statistical analysis. The project addresses, besides a  
27 specific culturing for *P. acnes*, molecular analysis and clinical outcomes follow-up in a  
28 single study, which provides a complexity and significance that were not achieved in  
29 previously published studies on this matter.  
30  
31

## 32 **METHODS AND ANALYSIS**

33  
34  
35 This study protocol is registered at *Clinicaltrials.gov* under NCT0315876.  
36 <https://clinicaltrials.gov/ct2/show/NCT03158766?term=NCT03158766&rank=1>  
37

### 38 **Study design:**

39 An open prospective cohort study will be performed at a single center, (Hospital  
40 Israelita Albert Einstein – HIAE) taking 1 year for recruiting, and ending 1 year after  
41 inclusion of last patient. Patients' data will be collected with a specific form created for  
42 this study. Patients will be summoned for a new magnetic resonance image of the  
43 lumbar spine one year after their surgical procedure.  
44

45 All included patients will go through further treatment of ten sessions of  
46 postoperative physical therapy. They will be instructed to maintain learned exercises in  
47 their residences. Pain medications will not be controlled and will follow attending  
48 physician prescriptions.  
49

### 50 **Population:**

51 Patients will be consecutively included in the study.

- 52 - **Inclusion criteria:** Subjects between 18 and 65 years of age; both genders;  
53 with diagnose of lumbar disc herniation undergoing open decompression  
54 surgery (microdiscectomy). Patients willing and able to go through all phases  
55 of clinical investigation and rehabilitation will be included. An Informed  
56 Consent Form (ICF) must be signed.  
57  
58  
59  
60

- **Exclusion criteria:** Patients with previous lumbar disc surgery at the same level at any point of life; patients undergoing chemotherapy; patients with any immune deficiency; patients previously submitted to disc injection and/or discography; patients submitted to previous endoscopic disc surgery; patients with fusion performed at the same stage of decompression surgery; patients with any other infection within the last six months or usage of antibiotics within the last two months; patients with incomplete specific form or data; decline to participate or sign the ICF.

### **Patient enrollment in the study:**

Evaluation of patient eligibility will be carried out by the main investigator or by a co-investigator, both study coordinator that will perform an interview with candidate patient about his willing to participate in the study. They will be responsible to confirm inclusion and exclusion criteria; and, if patient accepts his participation, the investigator will explain all study details and read along the Informed Consent Form, when any questioning on the objective of the study, involved procedures, risks/benefits, confidentiality, will be resolved.

Patients accepting their participation will date and sign the ICF. A copy of the form will be attached to patients' medical record, and another will be provided to the patient. After ICF is properly signed, patient will undergo an interview to complete initial demographic data and pretreatment forms.

If patient is unable to sign the written ICF, the investigator will orientate and vocally explain the study and patient will provide an oral consent in the presence of a witness that will sign the ICF.

Patient recruitment will be carried out for 24 months, when 95 patients shall be included (details of estimated  $n$  reported at sample size determination).

### **Patient allocation**

Patients will undergo surgery according to surgeons' preference. Attending surgeons will determine chosen operative technique according to their experience and preference.

### **Blinding**

Patients will not have access to the results of tissue cultures for pathogens, as well as the attending physician.

The radiologist that will analyze imaging studies of performed magnetic resonance will also be blinded to patients' data or laboratory culture results. A blinded investigator will analyze pain and function scores.

### **Early stopping of participation in the study**

Patients will be excluded from the study when:

- Withdrawn of ICF
- Diseased
- Patient selection flaw - incompatible eligibility criteria
- Lost to follow-up
- If patient presents clinical symptoms of infection such as severe lumbar or radicular pain, fever with no other detected foci, abnormal ESR, CRP, leucogram, and, altered imaging studies that leads to interruption of blinding of the results of culture exams.

1  
2  
3 For each eventually excluded case, reasons and circumstances for withdrawn will  
4 be detailed. Patients' data collected until determinate point of the study will be  
5 included at final analysis.  
6

## 7 8 Selected endpoints

### 9 10 Primary endpoint

#### 11 - Real rate of intervertebral disc infection

12 The main objective of this study considers that the intervertebral  
13 disc is infected by any type of low virulence pathogen, which leads  
14 to Modic changes and chronic low back pain. Thus, calculation of  
15 the incidence of infection in lumbar disc herniations will be  
16 performed.

- 17  
18 1. **Incidence of infection rate (IIR)** will be calculated as  
19 follows:

$$20 \text{ IIR} = \frac{\text{(number of detected infections)}}{\text{(total number of included patients)}}$$

### 21 22 23 Secondary endpoint

#### 24 - Low back pain

25 Intensity of low back pain and limitation for daily activities of  
26 patients with and without infection will be analyzed through the  
27 Numeric Rating Score (NRS) system applied at time of patient  
28 recruitment and 1, 3, 6 and 12 months after surgical procedure.  
29 Minimal clinically important difference will be considered as an  
30 increase of 30% of baseline lumbar pain at first postoperative  
31 month, due to possible bias of postoperative pain due to surgical  
32 manipulation as well as pain due to the disc herniation itself.

33 NRS and the visual analogue scale (VAS) have good correlation and  
34 are equally sensitive to quantify postoperative pain<sup>15</sup>. Compared to  
35 VAS, NRS is easier to manage and codify, furthermore, less  
36 mistakes occur during data insertion<sup>16</sup>. Otherwise, it is easier to  
37 complete<sup>16</sup> and preferred by patients<sup>17</sup>.

#### 38 39 40 - Quality of life

41 Quality of life at the end of one year for both infected and  
42 uninfected groups, with and without Modic changes, will be  
43 analyzed through the validated Portuguese version of the EuroQol  
44 (EQ-5D) questionnaire. This measurement tool will be applied at  
45 timing of patient recruitment, and 1, 3, 6 and 12 months after  
46 surgery.

47 EQ-5D is a self-completing standardized tool containing 5 items  
48 (mobility, self-care, usual activities, pain/discomfort, and  
49 anxiety/depression). Compared to the Short-Form 36 (SF-36)  
50 questionnaire, EQ-5D is a shorter and faster form to analyze.  
51  
52

#### 53 54 55 - Function

56 Function will be quantified through the Portuguese version of the  
57 Oswestry Disability Index (ODI) for lumbar pain that will be  
58  
59  
60



applied at time of recruitment and 1, 3, 6 and 12 months after surgery.

**- Modic incidence**

Insurgent Modic changes in patients will be analyzed one year after surgery, as well as its relationship with presence or absence of infection.

Incidence of Modic (IM) changes will be calculated for the infection group (IM infec) and for the total group (IM total) as follows:

$$\text{IM infec} = \frac{\text{(number of Modic changes in infected patients after 1 year)}}{\text{(total number of infections)}}$$

$$\text{IM total} = \frac{\text{number of Modic changes at final 1 year follow-up}}{\text{total number of patients}}$$

**- Volume and size of Modic changes, additional imaging analysis**

Quantification of sizing will be done by two radiologists with expertise in musculoskeletal diagnosis. All images will be analyzed in sagittal T1, T2, and FAT-T2 weight sequences of the lumbar spine in DICOM format. Modic volume will be measured according to Wang et al<sup>18</sup>. Three sagittal slices of the lumbar spine will be considered: midsagittal slice; left pedicle parasagittal slice; and right pedicle parasagittal slice. The parameters examined to quantify Modic changes will include measures of ratios of the region affected by Modic changes to the entire corresponding vertebral body, including maximal width ratio, maximal height ratio, and area ratio. Vertebral body changes will be classified accordingly to Modic changes type I, II, and III<sup>1,2</sup>. Soft tissues around the vertebra, such as disc, muscles, and ligaments will also be analyzed. Data will be collected for presence of vertebral or disc edema, and presence of disc hydration or not. Disc degeneration will be collected as: normal; degeneration with height preservation; and, degeneration with loss of height. Preop and 12-month postop acquired MRI studies will be compared. Both superior and inferior disc endplates will be evaluated and compared. Preoperative study will be taken as baseline for comparative purposes.

**- Adverse effects**

Fail of surgical treatment (recurrence, instability, need for reoperation, etc.); need for additional physical therapy sessions; superficial infection; drainage; deep venous thrombosis; and, any

other possible adverse event that may show up will be included as well.

## Study stages

### Sample collection:

Included patients will undergo standard fashion general anesthesia and prepped with chlorhexidine solution. Intravenous antibiotics prophylaxis will be administered within first hour before skin incision, according to standard protocol of HIAE Infection Control Committee published at the hospital Pharmaceutics Manual.

Preoperative blood sample will be collected for leucogram, ESR, and CRP. Same laboratory will be repeated at 1, 6 and 12 months time-point.

The excised herniated disc fragment will be immediately sent to microbiology laboratory analysis in a universal sterile container (screw cap tube) in no more than 30 minutes to be processed as follows. Same process will be applied to samples of deep muscle and ligamentum flavum at the end of the surgical procedure. Three cultures of the intervertebral disc will be done, as well as three of the ligamentum flavum and three of the multifidus muscle for each patient. Flowchart of this stage is described in Figure1.

### Search for pathogens:

Herniated intervertebral disc will be split in three equally sized fragments of over 2x2x5 mm and squashed in a laminar flow cabinet until homogeneous material is achieved. Same process will be carried out for the ligamentum flavum and multifidus muscle samples, although split in three fragments. Tissues will be cultured in specific growth medium and incubated according to the respective culture:

Similar criteria used by the Infectious Diseases Society of America (IDSA) to detect joint replacement infection will be adopted, which is the recommendation on at least two positive tissue cultures by the same pathogen to confirm diagnosis of infection<sup>19</sup>. This same criterion was already adopted in a study to characterize isolated pathogens in herniated intervertebral discs<sup>14</sup>.

#### - A - Aerobic culture

For aerobic cultures, samples will be cultured in 5% sheep blood agar, chocolate agar and MacConkey agar plate, and will be placed in a 35°C incubator (CO<sub>2</sub> atmosphere) for 5 days. If a positive bacteria culture is detected in the plate, the colony will be identified by MALDI TOF (Matrix Assisted Laser Desorption Ionization-Time of Flight) Microflex LT (Bruker Daltonics/BD). Sensitivity profile will be performed when needed, according to CLSI (Clinical Laboratory Standards Institute) recommendations.

#### - B - Anaerobic culture

For anaerobic culture, tissue will be cultured in a Thioglycolate tube and incubated in a 35°C incubator for up to 21 days. If turbidity occurs at the Thioglycolate medium, material will be cultured in anaerobic blood agar and incubation at 35°C will be done in an anaerobic atmosphere. After growing of colonies, identification will

be done by MALDI TOF and, when necessary, a sensitivity test to antibiotics will be performed according to CLSI recommendations.

#### - C - Histological analysis

Anatomic pathology analysis of the other fragment of the herniated disc (2x2x5 mm) will be done. Sample will be transported in a universal container with tamponated formalin (10%), followed by dehydration in alcohol diafanized in xylol and inclusion in paraffin (60-65°C), which will be stained in hematoxylin-eosin (HE) and GRAM staining.

- **HE:** Histological cuts of 4µm will be performed, followed by clearing with xylol for 10 minutes twice, embedding with alcohol under increasing concentrations and stained with hematoxylin for 5 minutes, running water for 5 minutes, eosin for 1 minute and running water for 2 minutes followed by assembly of glass microscope slide with Entellan®.
- **GRAM:** Another slide will be embedded with crystal violet for 1 minute, running water for 1 minute followed by lugol for another 1 minute and additional wash with running water. Unstaining of the slide will be done with alcohol 95% for 10 seconds followed by running water and then, stain with fuchsine for 30 seconds, running water wash again, drying and slide assembly with Entellan®.

#### - D - Molecular analysis of pathogens

Positive cultures that present aerobic or anaerobic pathogens culturing, will be isolated and stowed refrigerated in -80°C freezer for posterior molecular analysis.

Molecular typing will be performed through Pulsed Field Gel Electrophoresis technique of isolated samples according to the protocol described by Oprica et al.<sup>20</sup> using Spe-I restriction enzyme and Bionumerics software for analysis of results.

#### Questionnaires

Scores for pain (NRS), function (ODI), and quality of life (EQ-5D) will be self assessed and applied before surgery and at 1, 3, 6 and 12 months time-points. All questionnaires will be collected by a employee not involved in the study. Follow-up clinic visits will be at 1, 3, 6 and 12 months after surgical procedure, with acceptance deviation of 7, 14, 21, and 28 days, respectively.

#### Imaging studies

Magnetic resonance imaging studies will be performed in Siemens or General Electric 1.5T devices. Studies in 3.0T devices will not be done due to higher frequency of artifacts generated by chemical shift, which would modify measurements of Modic changes.

The following sequences will be used:

- Sagittal cut: Fast Spin-Echo T1 and T2 weighted with fat suppression or STIR instead of T2, according to our institution protocol established for all exams
- Coronal cut: same sequence imaging will be used for measurements.

At follow-up, contrasted MRI studies of patients will be done as an institution established protocol for postoperative patients, otherwise, it will not interfere with the study protocol.

Lumbar disc herniation will be diagnosed through MRI in eligible patients. Included patients will be submitted to new MRI 12 months after surgery.

Two radiologists with expertise in musculoskeletal MRI will independently classify and perform measurements, and divergences will be solved blindly by common opinion.

### Confounding variables

Data on the following confounding variables will be collected: age, gender, alcohol intake, smoking, body mass index (BMI), spinal injections with corticoid within 6 months before surgery, usage of oral corticoids up to 3 months before surgery, diabetes.

Since this information may change over time, data will be considered at time of last assessment before surgery.

**A – Alcohol intake:** categorized as – none or sporadically (<1 glass/day); light intake (1-2 glass/day); moderate/heavy intake (3 or more glasses/day); and, not assessed<sup>21</sup>.

**B – Smoking:** categorized as – ex-smokers; smoker; non-smoker; and, not assessed<sup>22</sup>.

**C – BMI:** categorized as – underweight (<18.5); normal weight (18.5-25); overweight (25-30); obese (>30); not assessed or not available<sup>23</sup>.

### ETHICS AND DISSEMINATION

This study is going to be submitted to our Institutional Review Board (IRB) and will only begin after its approval. Patients accepting to participate will sign an Informed Consent Form before entering the study. Results will be published in a peer reviewed medical journal and presented in medical conferences independently of study findings.

Some authors suggest that subclinical infection of the intervertebral disc is one of the causes of chronic low back pain unresponsive to treatment, besides promoting Modic type I changes on MRI. Although there are studies reporting relative success on treatment of well-selected patients, there is still uncertainty that these patients were really infected or not.

We hope to define the accurate incidence of subclinical infection of the intervertebral disc with disc herniation and provide data and possibly an answer to this present gap in the literature.

### STATISTICAL PLANNING

Rate of subclinical infection (or Modic change) will be obtained by the ratio between number of positive cultures from surgical samples and total number of patients, and estimates will follow 95% confidence intervals. After infection cases are identified, we will investigate if there is an association between detected infection and patient outcomes by logistic regression models for Modic changes, ordinal logistic regression for Modic volume and size, and linear regression or general linear models for numeric outcomes, such as: low back pain, quality of life and function. All models will

1  
2  
3 consider confounding variables such as: smoking and alcohol intake, diabetes,  
4 corticosteroids injection, BMI, gender, and age. Results will be presented as effects  
5 estimates such as odds ratio or mean ratio, 95% confidence intervals and *p* values. Study  
6 dropout cases, for any reason, will be considered for final analysis.  
7

### 8 9 *Sample size calculation*

10 Sample size was calculated to estimate of incidence of subclinical infection in  
11 patients with lumbar disc herniation. Considering that the rate of infection lies around  
12 46%<sup>3</sup>, we need to observe a minimum of 95 patients to achieve a 95% confidence  
13 interval with 10% absolute accuracy.

14 The necessary sample size to analyze secondary endpoints will depend on the  
15 observed rate of cases with subclinical infection in our study sample. If the observed  
16 rate is too small, an increase in the number of included patients will be needed. To  
17 better evaluate this, the sample size calculation will be revisited by the time we have  
18 reached half of initially planned sample size (48 patients).  
19

### 20 21 **CHRONOGRAM**

22 At the end of the protocol (Table 1 and 2)  
23

### 24 25 **FUNDING STATEMENT**

26 This work was supported by Fundação de Amparo à Pesquisa do Estado de São  
27 Paulo (FAPESP) grant number 2016/15830-7.  
28

### 29 30 **COMPETING INTERESTS STATEMENT**

31 Authors have no potential conflict of interests.  
32

### 33 34 **AUTHORS CONTRIBUTIONS**

35 **Nelson Astur** – Spine surgeon – Conception and design of the work, data  
36 collection, data analysis and interpretation, drafting the article

37 **Delio E. Martins** – Spine surgeon – Conception and design of the work, data  
38 collection, data analysis and interpretation, critical revision of the article, final approval  
39 of the version to be published

40 **Marcelo Wajchenberg** – Spine surgeon – Data collection, critical revision of the  
41 article, final approval of the version to be published

42 **Mario Ferreti** – Orthopedic surgeon – Critical revision of the article, final  
43 approval of the version to be published

44 **Fernando G. Menezes** – Infectologist – Conception and design of the work, final  
45 approval of the version to be published

46 **Andre M. Doi** – Microbiologist – Conception and design of the work, data  
47 collection, data analysis and interpretation

48 **Laercio A. Rosemberg** – Radiologist – Design of the work, data analysis and  
49 interpretation, data collection

50 **Durval C. B. Santos** – Radiologist – Design of the work, data analysis and  
51 interpretation, data collection

52 **Alexandre S. Yutaka** – Spine surgeon – Data collection, critical revision of the  
53 article

54 **Luciano M. R. Rodrigues** – Spine surgeon – Data collection, critical revision of  
55 the article  
56  
57  
58  
59  
60

1  
2  
3 **Arthur W. Poetscher** – Spine surgeon – Data collection, critical revision of the  
4 article

5 **Marines D. V. Martino** – Microbiologist – Data collection, critical revision

6 **Mario Lenza** – Orthopedic surgeon – Conception of the work, critical revision of  
7 the article, final approval of the version to be published  
8  
9  
10  
11  
12  
13  
14  
15  
16  
17  
18  
19  
20  
21  
22  
23  
24  
25  
26  
27  
28  
29  
30  
31  
32  
33  
34  
35  
36  
37  
38  
39  
40  
41  
42  
43  
44  
45  
46  
47  
48  
49  
50  
51  
52  
53  
54  
55  
56  
57  
58  
59  
60

## References

1. Modic, MT, Steinberg, PM, Ross, JS, Masaryk, TJ, Carter, JR: Degenerative disk disease: assessment of changes in vertebral body marrow with MR imaging. *Radiology* 1988;166:193–199.
2. Modic, MT, Masaryk, TJ, Ross, JS, Carter, JR: Imaging of degenerative disk disease. *Radiology* 1988;168:177–86.
3. Jensen, TS, Karppinen, J, Sorensen, JS, Niinimäki, J, Leboeuf-Yde, C: Vertebral endplate signal changes (Modic change): A systematic literature review of prevalence and association with non-specific low back pain. *Eur Spine J* 2008;17:1407–1422.
4. Toyone, T, Takahashi, K, Kitahara, H, Yamagata, M, Murakami, M, Moriya, H: Vertebral bone-marrow changes in degenerative lumbar disc disease. An MRI study of 74 patients with low back pain. *J Bone Joint Surg Br* 1994;76:757–764.
5. Albert, HB, Kjaer, P, Jensen, TS, Sorensen, JS, Bendix, T, Manniche, C: Modic changes, possible causes and relation to low back pain. *Med Hypotheses* 2008;70:361–368.
6. Ohtori, S, Koshi, T, Yamashita, M, Yamauchi, K, Inoue, G, Suzuki, M, Takaso, M, Orita, S, Eguchi, Y, Ochiai, N, *et al.*: Existence of pyogenic spondylitis in Modic type 1 change without other signs of infection: 2-year follow-up. *Eur Spine J* 2010;19:1200–1205.
7. Albert, HB, Sorensen, JS, Christensen, BS, Manniche, C: Antibiotic treatment in patients with chronic low back pain and vertebral bone edema (Modic type 1 changes): A double-blind randomized clinical controlled trial of efficacy. *Eur Spine J* 2013;22:697–707.
8. Albert, HB, Lambert, P, Rollason, J, Sorensen, JS, Worthington, T, Pedersen, MB, Norgaard, HS, Vernallis, A, Busch, F, Manniche, C, *et al.*: Does nuclear tissue infected with bacteria following disc herniations lead to Modic changes in the adjacent vertebrae? *Eur Spine J* 2013;22:690–696.
9. Stirling, A, Worthington, T, Rafiq, M, Lambert, PA, Elliott, TSJ: Association between sciatica and *Propionibacterium acnes*. *Lancet* 2001;357:2024–2025.
10. Agarwal, V, Golish, SR, Alamin, TF: Bacteriologic culture of excised intervertebral disc from immunocompetent patients undergoing single level primary lumbar microdiscectomy. *J Spinal Disord Tech* 2011;24:397–400.
11. Carricajo, A, Nuti, C, Aubert, E, Hatem, O, Fonsale, N, Mallaval, FO, Vautrin, AC, Brunon, J, Aubert, G: *Propionibacterium acnes* contamination in lumbar disc surgery. *J Hosp Infect* 2007;66:275–277.
12. Rigal, J, Thelen, T, Byrne, F, Cogniet, A, Boissière, L, Aunoble, S, Le Huec, J-C: Prospective study using anterior approach did not show association between Modic 1 changes and low grade infection in lumbar spine. *Eur Spine J* 2016;25:1000–1005.
13. Rollason, J, McDowell, A, Albert, HB, Barnard, E, Worthington, T, Hilton, AC, Vernallis, A, Patrick, S, Elliott, T, Lambert, P: Genotypic and antimicrobial characterisation of *propionibacterium acnes* isolates from surgically excised lumbar disc herniations. *Biomed Res Int* 2013;2013:
14. Urquhart, DM, Zheng, Y, Cheng, AC, Rosenfeld, J V, Chan, P, Liew, S, Hussain, SM, Cicuttini, FM: Could low grade bacterial infection contribute to low back pain? A systematic review. *BMC Med* 2015;13:13.
15. Breivik, H, Borchgrevink, PC, Allen, SM, Rosseland, LA, Romundstad, L, Breivik Hals, EK, Kvarstein, G, Stubhaug, A: Assessment of pain. *Br J Anaesth*

- 1  
2  
3 2008;101:17-24.
- 4 16. Ritter, PL, González, VM, Laurent, DD, Lorig, KR: Measurement of pain using the  
5 visual numeric scale. *J Rheumatol* 2006;33:574-80.
- 6 17. Gagliese, L, Weizblit, N, Ellis, W, Chan, VWS: The measurement of postoperative  
7 pain: A comparison of intensity scales in younger and older surgical patients. *Pain*  
8 2005;117:412-420.
- 9 18. Wang, Y, Videman, T, Niemelainen, R, Battie, MC, Niemeläinen, R, Battié, MC:  
10 Quantitative measures of modic changes in lumbar spine magnetic resonance  
11 imaging: intra- and inter-rater reliability. *Spine (Phila Pa 1976)* 2011;36:1236-  
12 1243.
- 13 19. Osmon, DR, Berbari, EF, Berendt, AR, Lew, D, Zimmerli, W, Steckelberg, JM, Rao, N,  
14 Hanssen, A, Wilson, WR, Infectious Diseases Society of America: Executive  
15 summary: diagnosis and management of prosthetic joint infection: clinical  
16 practice guidelines by the Infectious Diseases Society of America. *Clin Infect Dis*  
17 2013;56:1-10.
- 18 20. Oprica, C, Emtestam, L, Lapins, J, Borglund, E, Nyberg, F, Stenlund, K, Lundeberg, L,  
19 Sillerström, E, Nord, CE: Antibiotic-resistant *Propionibacterium acnes* on the skin  
20 of patients with moderate to severe acne in Stockholm. *Anaerobe* 2004;10:155-  
21 164.
- 22 21. Alcohol drinking. IARC Working Group, Lyon, 13-20 October 1987. *IARC Monogr*  
23 *Eval Carcinog risks to humans* 1988;44:1-378.
- 24 22. IARC Working Group on the Evaluation of Carcinogenic Risks to Humans: Tobacco  
25 smoke and involuntary smoking. *IARC Monogr Eval Carcinog risks to humans*  
26 2004;83:1-1438.
- 27 23. Reeves, GK, Pirie, K, Beral, V, Green, J, Spencer, E, Bull, D, Million Women Study  
28 Collaboration: Cancer incidence and mortality in relation to body mass index in  
29 the Million Women Study: cohort study. *BMJ* 2007;335:1134.
- 30  
31  
32  
33  
34  
35  
36  
37  
38  
39  
40  
41  
42  
43  
44  
45  
46  
47  
48  
49  
50  
51  
52  
53  
54  
55  
56  
57  
58  
59  
60



1  
2  
3  
4  
5  
6  
7  
8  
9  
10  
11  
12  
13  
14  
15  
16  
17  
18  
19  
20  
21  
22  
23  
24  
25  
26  
27  
28  
29  
30  
31  
32  
33  
34  
35  
36  
37  
38  
39  
40  
41  
42  
43  
44  
45  
46  
47  
48  
49  
50  
51  
52  
53  
54  
55  
56  
57  
58  
59  
60

**Figure legends**

Figure 1: Flowchart of collected clinical samples that will be sent to culture analysis.

For peer review only

Table 1: Study chronogram

| Month / Year         | IRB approval | Recruiting | Last cases follow-up | Data analysis | Data interpretation | Final report | Submission to peer-reviewed journal |
|----------------------|--------------|------------|----------------------|---------------|---------------------|--------------|-------------------------------------|
| Jan 2017 to Feb 2017 | X            |            |                      |               |                     |              |                                     |
| Mar 2017 to Mar 2018 |              | X          | X                    |               |                     |              |                                     |
| Mar 2017 to Mar 2019 |              |            | X                    |               |                     |              |                                     |
| Nov 2018 to Feb 2019 |              |            |                      | X             |                     |              |                                     |
| Feb 2019 to Apr 2019 |              |            |                      | X             | X                   |              |                                     |
| Apr 2019 to Jun 2019 |              |            |                      |               | X                   | X            |                                     |
| Jun to Dec 2019      |              |            |                      |               |                     |              | X                                   |

Table 2: Chronogram of included patients

|                                                           | Screening/<br>Recruiting | Postop 4 weeks $\pm$ 7<br>days | Postop 3 months $\pm$<br>14 days | Postop 6 months $\pm$<br>21 days | Postop 12 months<br>$\pm$ 30 days |
|-----------------------------------------------------------|--------------------------|--------------------------------|----------------------------------|----------------------------------|-----------------------------------|
|                                                           | Visit 1                  | Visit 2                        | Visit 3                          | Visit 4                          | Visit 5                           |
| ICF                                                       | X                        |                                |                                  |                                  |                                   |
| Check including and excluding<br>criteria                 | X                        |                                |                                  |                                  |                                   |
| Collect demographic data                                  | X                        |                                |                                  |                                  |                                   |
| Investigate medical history /<br>Complete enrollment form | X                        |                                |                                  |                                  |                                   |
| Lab screening, ESR, CRP,<br>Leucogram                     | X                        | X                              |                                  | X                                | X                                 |
| Apply NRS tool                                            | X                        | X                              | X                                | X                                | X                                 |
| Apply Oswestry questionnaire                              | X                        | X                              | X                                | X                                | X                                 |
| Apply EQ-5D questionnaire                                 | X                        | X                              | X                                | X                                | X                                 |
| Physical therapy                                          |                          | X                              |                                  |                                  |                                   |
| Magnetic resonance imaging                                |                          |                                |                                  |                                  | X                                 |

ICF = Informed Consent Form; ESR = erythrocyte sedimentation rate; CRP = C reactive protein; NRS = Numeric rating scale; EQ-5D = European quality of life 5 dimensions.

**Financing planning: Approved by FAPESP**

|   | Description                                                        | Final cost (R\$) |
|---|--------------------------------------------------------------------|------------------|
| 1 | Molecular typing<br>necessary material                             | 22.471,59        |
| 2 | Antimicrobial<br>sensitivity testing<br>necessary material         | 3.300,00         |
| 3 | Strain storage<br>necessary material                               | 3.702,00         |
| 4 | Laboratory culture<br>necessary material                           | 44.462,00        |
| 5 | Laboratory waste<br>disposal material                              | 550,00           |
| 6 | Bacterial strain<br>identification material                        | 11.247,90        |
| 7 | Technical reserve –<br>Additional benefits                         | 16.000,00        |
| 8 | Technical reserve –<br>budget for direct<br>project infrastructure | 12.860,02        |
|   |                                                                    | 114.593,51       |

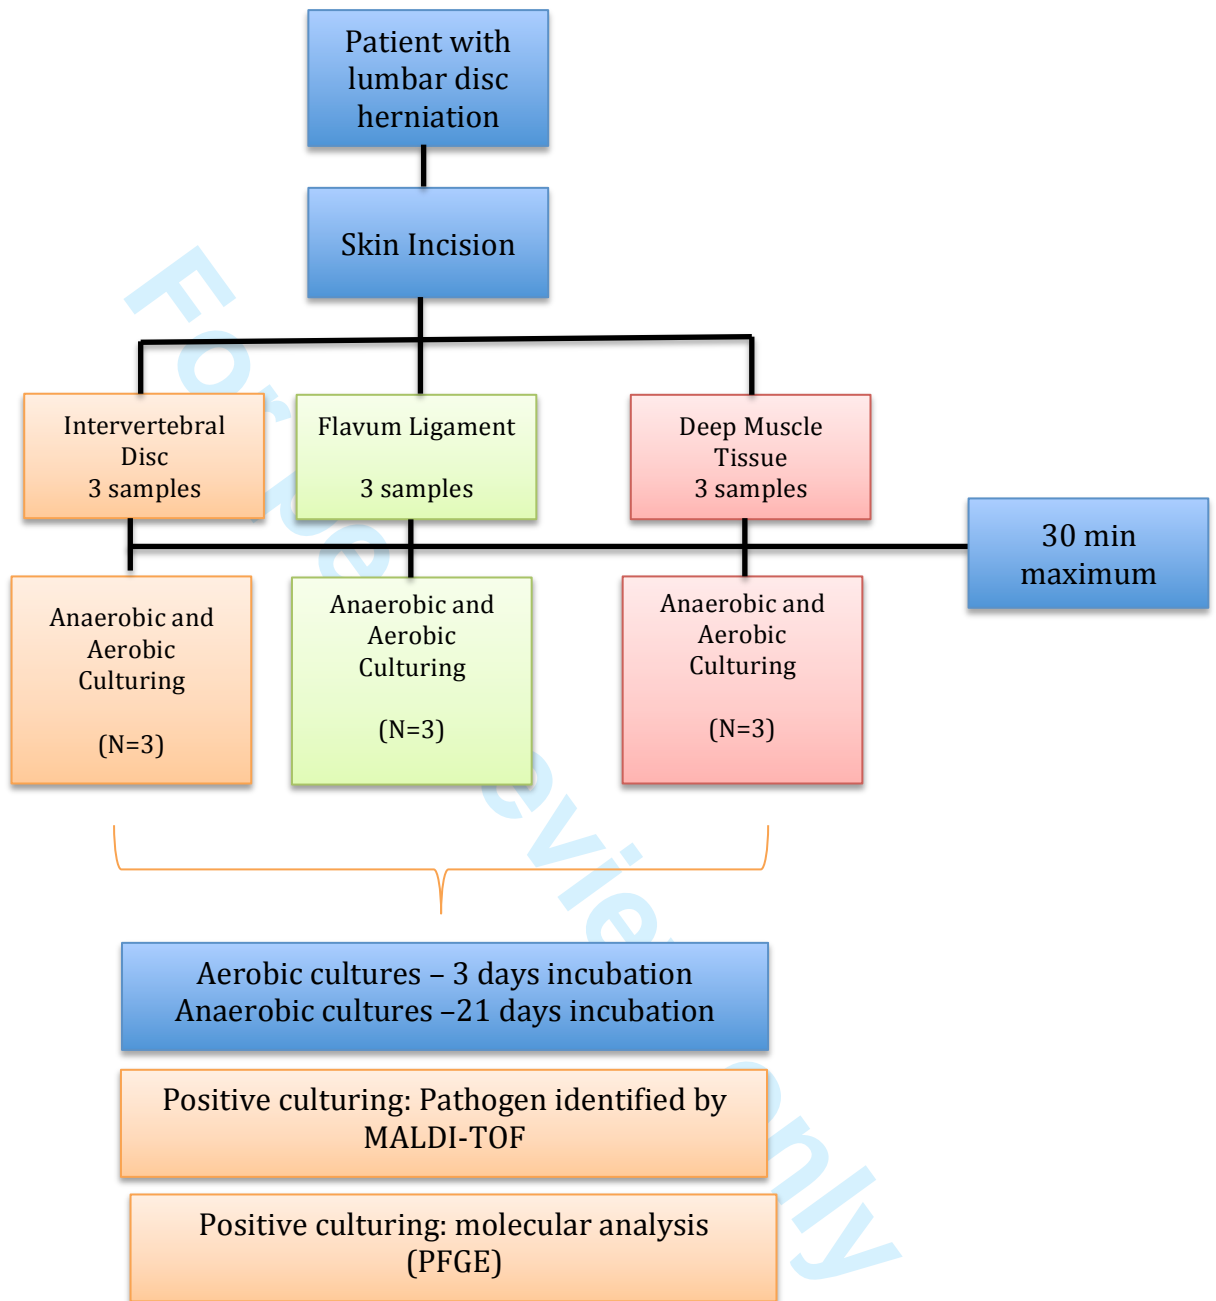

## STROBE Statement—checklist of items that should be included in reports of observational studies

|                              | Item No | Recommendation                                                                                                                                                                                                                                                                                                                                                                                                                                                                                                                                                                                                                                                                                                           |
|------------------------------|---------|--------------------------------------------------------------------------------------------------------------------------------------------------------------------------------------------------------------------------------------------------------------------------------------------------------------------------------------------------------------------------------------------------------------------------------------------------------------------------------------------------------------------------------------------------------------------------------------------------------------------------------------------------------------------------------------------------------------------------|
| <b>Title and abstract</b>    | 1       | (a) Indicate the study's design with a commonly used term in the title or the abstract <b>pg1</b><br>(b) Provide in the abstract an informative and balanced summary of what was done and what was found <b>attached to submission</b>                                                                                                                                                                                                                                                                                                                                                                                                                                                                                   |
| <b>Introduction</b>          |         |                                                                                                                                                                                                                                                                                                                                                                                                                                                                                                                                                                                                                                                                                                                          |
| Background/rationale         | 2       | Explain the scientific background and rationale for the investigation being reported <b>pg2</b>                                                                                                                                                                                                                                                                                                                                                                                                                                                                                                                                                                                                                          |
| Objectives                   | 3       | State specific objectives, including any prespecified hypotheses <b>pg3</b>                                                                                                                                                                                                                                                                                                                                                                                                                                                                                                                                                                                                                                              |
| <b>Methods</b>               |         |                                                                                                                                                                                                                                                                                                                                                                                                                                                                                                                                                                                                                                                                                                                          |
| Study design                 | 4       | Present key elements of study design early in the paper <b>pg3</b>                                                                                                                                                                                                                                                                                                                                                                                                                                                                                                                                                                                                                                                       |
| Setting                      | 5       | Describe the setting, locations, and relevant dates, including periods of recruitment, exposure, follow-up, and data collection <b>pg3-4</b>                                                                                                                                                                                                                                                                                                                                                                                                                                                                                                                                                                             |
| Participants                 | 6       | (a) <i>Cohort study</i> —Give the eligibility criteria, and the sources and methods of selection of participants. Describe methods of follow-up <b>pg3-4</b><br><i>Case-control study</i> —Give the eligibility criteria, and the sources and methods of case ascertainment and control selection. Give the rationale for the choice of cases and controls<br><i>Cross-sectional study</i> —Give the eligibility criteria, and the sources and methods of selection of participants<br>(b) <i>Cohort study</i> —For matched studies, give matching criteria and number of exposed and unexposed <b>N/A</b><br><i>Case-control study</i> —For matched studies, give matching criteria and the number of controls per case |
| Variables                    | 7       | Clearly define all outcomes, exposures, predictors, potential confounders, and effect modifiers. Give diagnostic criteria, if applicable <b>pg5-6</b>                                                                                                                                                                                                                                                                                                                                                                                                                                                                                                                                                                    |
| Data sources/<br>measurement | 8*      | For each variable of interest, give sources of data and details of methods of assessment (measurement). Describe comparability of assessment methods if there is more than one group <b>pg7-8</b>                                                                                                                                                                                                                                                                                                                                                                                                                                                                                                                        |
| Bias                         | 9       | Describe any efforts to address potential sources of bias <b>pg 9</b>                                                                                                                                                                                                                                                                                                                                                                                                                                                                                                                                                                                                                                                    |
| Study size                   | 10      | Explain how the study size was arrived at <b>pg 10</b>                                                                                                                                                                                                                                                                                                                                                                                                                                                                                                                                                                                                                                                                   |
| Quantitative variables       | 11      | Explain how quantitative variables were handled in the analyses. If applicable, describe which groupings were chosen and why <b>pg 9</b>                                                                                                                                                                                                                                                                                                                                                                                                                                                                                                                                                                                 |
| Statistical methods          | 12      | (a) Describe all statistical methods, including those used to control for confounding <b>pg 9</b><br>(b) Describe any methods used to examine subgroups and interactions <b>pg 9</b><br>(c) Explain how missing data were addressed <b>pg 4</b><br>(d) <i>Cohort study</i> —If applicable, explain how loss to follow-up was addressed <b>pg 4</b><br><i>Case-control study</i> —If applicable, explain how matching of cases and controls was addressed<br><i>Cross-sectional study</i> —If applicable, describe analytical methods taking account of sampling strategy<br>(e) Describe any sensitivity analyses                                                                                                        |

Continued on next page

**Results** **PROTOCOL OF STUDY – NO RESULTS AVAILABLE**

|                                                                                       |     |                                                                                                                                                                                                                                                                                                                                                                                                                                                                     |
|---------------------------------------------------------------------------------------|-----|---------------------------------------------------------------------------------------------------------------------------------------------------------------------------------------------------------------------------------------------------------------------------------------------------------------------------------------------------------------------------------------------------------------------------------------------------------------------|
| Participants                                                                          | 13* | (a) Report numbers of individuals at each stage of study—eg numbers potentially eligible, examined for eligibility, confirmed eligible, included in the study, completing follow-up, and analysed <b>PROTOCOL OF STUDY – NO RESULTS AVAILABLE</b><br>(b) Give reasons for non-participation at each stage <b>PROTOCOL OF STUDY – NO RESULTS AVAILABLE</b><br>(c) Consider use of a flow diagram <b>PROTOCOL OF STUDY – NO RESULTS AVAILABLE (Table 2)</b>           |
| Descriptive data                                                                      | 14* | (a) Give characteristics of study participants (eg demographic, clinical, social) and information on exposures and potential confounders <b>PROTOCOL OF STUDY – NO RESULTS AVAILABLE</b><br>(b) Indicate number of participants with missing data for each variable of interest <b>PROTOCOL OF STUDY – NO RESULTS AVAILABLE</b><br>(c) <i>Cohort study</i> —Summarise follow-up time (eg, average and total amount) <b>PROTOCOL OF STUDY – NO RESULTS AVAILABLE</b> |
| Outcome data                                                                          | 15* | <i>Cohort study</i> —Report numbers of outcome events or summary measures over time <b>PROTOCOL OF STUDY – NO RESULTS AVAILABLE</b><br><i>Case-control study</i> —Report numbers in each exposure category, or summary measures of exposure<br><i>Cross-sectional study</i> —Report numbers of outcome events or summary measures                                                                                                                                   |
| Main results                                                                          | 16  | (a) Give unadjusted estimates and, if applicable, confounder-adjusted estimates and their precision (eg, 95% confidence interval). Make clear which confounders were adjusted for and why they were included <b>PROTOCOL OF STUDY – NO RESULTS AVAILABLE</b><br>(b) Report category boundaries when continuous variables were categorized<br>(c) If relevant, consider translating estimates of relative risk into absolute risk for a meaningful time period       |
| Other analyses                                                                        | 17  | Report other analyses done—eg analyses of subgroups and interactions, and sensitivity analyses <b>PROTOCOL OF STUDY – NO RESULTS AVAILABLE</b>                                                                                                                                                                                                                                                                                                                      |
| <b>Discussion</b> <b>PROTOCOL OF STUDY – NO DISCUSSION BASED ON RESULTS AVAILABLE</b> |     |                                                                                                                                                                                                                                                                                                                                                                                                                                                                     |
| Key results                                                                           | 18  | Summarise key results with reference to study objectives                                                                                                                                                                                                                                                                                                                                                                                                            |
| Limitations                                                                           | 19  | Discuss limitations of the study, taking into account sources of potential bias or imprecision. Discuss both direction and magnitude of any potential bias                                                                                                                                                                                                                                                                                                          |
| Interpretation                                                                        | 20  | Give a cautious overall interpretation of results considering objectives, limitations, multiplicity of analyses, results from similar studies, and other relevant evidence                                                                                                                                                                                                                                                                                          |
| Generalisability                                                                      | 21  | Discuss the generalisability (external validity) of the study results                                                                                                                                                                                                                                                                                                                                                                                               |
| <b>Other information</b>                                                              |     |                                                                                                                                                                                                                                                                                                                                                                                                                                                                     |
| Funding                                                                               | 22  | Give the source of funding and the role of the funders for the present study and, if applicable, for the original study on which the present article is based <b>pg 1 and pg 16</b>                                                                                                                                                                                                                                                                                 |

\*Give information separately for cases and controls in case-control studies and, if applicable, for exposed and unexposed groups in cohort and cross-sectional studies.

**Note:** An Explanation and Elaboration article discusses each checklist item and gives methodological background and published examples of transparent reporting. The STROBE checklist is best used in conjunction with this article (freely available on the Web sites of PLoS Medicine at <http://www.plosmedicine.org/>, Annals of Internal Medicine at

1  
2 <http://www.annals.org/>, and Epidemiology at <http://www.epidem.com/>). Information on the STROBE Initiative is  
3 available at [www.strobe-statement.org](http://www.strobe-statement.org).  
4  
5  
6  
7  
8  
9  
10  
11  
12  
13  
14  
15  
16  
17  
18  
19  
20  
21  
22  
23  
24  
25  
26  
27  
28  
29  
30  
31  
32  
33  
34  
35  
36  
37  
38  
39  
40  
41  
42  
43  
44  
45  
46  
47  
48  
49  
50  
51  
52  
53  
54  
55  
56  
57  
58  
59  
60

For peer review only



# BMJ Open

## Subclinical Propionibacterium Acnes Infection Estimation in the Intervertebral Disc (SPInE-ID): Protocol for a Prospective Cohort.

|                                 |                                                                                                                                                                                                                                                                                                                                                                                                                                                                                                                                                                                                                                                                                                                                                                                                                                                                                                                                                                                                                                                                                                                                                                                                                                               |
|---------------------------------|-----------------------------------------------------------------------------------------------------------------------------------------------------------------------------------------------------------------------------------------------------------------------------------------------------------------------------------------------------------------------------------------------------------------------------------------------------------------------------------------------------------------------------------------------------------------------------------------------------------------------------------------------------------------------------------------------------------------------------------------------------------------------------------------------------------------------------------------------------------------------------------------------------------------------------------------------------------------------------------------------------------------------------------------------------------------------------------------------------------------------------------------------------------------------------------------------------------------------------------------------|
| Journal:                        | <i>BMJ Open</i>                                                                                                                                                                                                                                                                                                                                                                                                                                                                                                                                                                                                                                                                                                                                                                                                                                                                                                                                                                                                                                                                                                                                                                                                                               |
| Manuscript ID                   | bmjopen-2017-017930.R1                                                                                                                                                                                                                                                                                                                                                                                                                                                                                                                                                                                                                                                                                                                                                                                                                                                                                                                                                                                                                                                                                                                                                                                                                        |
| Article Type:                   | Protocol                                                                                                                                                                                                                                                                                                                                                                                                                                                                                                                                                                                                                                                                                                                                                                                                                                                                                                                                                                                                                                                                                                                                                                                                                                      |
| Date Submitted by the Author:   | 23-Aug-2017                                                                                                                                                                                                                                                                                                                                                                                                                                                                                                                                                                                                                                                                                                                                                                                                                                                                                                                                                                                                                                                                                                                                                                                                                                   |
| Complete List of Authors:       | <p>Astur, Nelson; Hospital Israelita Albert Einstein, Programa Locomotor Martins, Delio; Hospital Israelita Albert Einstein, Programa Locomotor Wajchenberg, Marcelo; Hospital Israelita Albert Einstein, Programa Locomotor</p> <p>Ferreti, Mario; Hospital Israelita Albert Einstein, Programa Locomotor Menezes, Fernando; Hospital Israelita Albert Einstein, Serviço de Controle de Infecção Hospitalar</p> <p>Doi, Andre; Hospital Israelita Albert Einstein, Setor de Microbiologia do Laboratório Clínico</p> <p>Rosemberg, Laercio; Hospital Israelita Albert Einstein, Departamento de Diagnostico por Imagem</p> <p>Santos, Durval; Hospital Israelita Albert Einstein, Departamento de Diagnostico por Imagem</p> <p>Iutaka, Alexandre; Hospital Israelita Albert Einstein, Programa Locomotor Rodrigues, Luciano; Hospital Israelita Albert Einstein, Programa Locomotor</p> <p>Martino, Marines; Hospital Israelita Albert Einstein, Serviço de Microbiologia do Laboratorio Clinico</p> <p>Pagura, Jorge; Hospital Israelita Albert Einstein, Programa Locomotor Kihara Filho, Eduardo; Hospital Israelita Albert Einstein, Programa Locomotor</p> <p>Lenza, Mario; Hospital Israelita Albert Einstein, Programa Locomotor</p> |
| <b>Primary Subject Heading</b>: | Surgery                                                                                                                                                                                                                                                                                                                                                                                                                                                                                                                                                                                                                                                                                                                                                                                                                                                                                                                                                                                                                                                                                                                                                                                                                                       |
| Secondary Subject Heading:      | Infectious diseases, Radiology and imaging                                                                                                                                                                                                                                                                                                                                                                                                                                                                                                                                                                                                                                                                                                                                                                                                                                                                                                                                                                                                                                                                                                                                                                                                    |
| Keywords:                       | Spine < ORTHOPAEDIC & TRAUMA SURGERY, Magnetic resonance imaging < RADIOLOGY & IMAGING, Diagnostic microbiology < INFECTIOUS DISEASES, Propionibacterium acnes, Low back pain                                                                                                                                                                                                                                                                                                                                                                                                                                                                                                                                                                                                                                                                                                                                                                                                                                                                                                                                                                                                                                                                 |
|                                 |                                                                                                                                                                                                                                                                                                                                                                                                                                                                                                                                                                                                                                                                                                                                                                                                                                                                                                                                                                                                                                                                                                                                                                                                                                               |

SCHOLARONE™  
Manuscripts

1  
2  
3 **Subclinical *Propionibacterium acnes* Infection Estimation in the**  
4 **Intervertebral Disc (SPInE-ID): Protocol for a Prospective Cohort**  
5

6 Nelson Astur, MD, MSc  
7 Delio E. Martins, MD, PhD  
8 Marcelo Wajchenberg, MD, PhD  
9 Mario Ferreti, MD, PhD  
10 Fernando G. Menezes, MD  
11 Andre M. Doi, MD  
12 Laercio A. Rosemberg, MD, PhD  
13 Durval C. B. Santos, MD  
14 Alexandre S. Iutaka, MD  
15 Luciano M. R. Rodrigues, MD, PhD  
16 Marines D. V. Martino, MD, PhD  
17 Jorge R. Pagura, MD, PhD  
18 Eduardo N. Kihara Filho, MD  
19 Mario Lenza, MD, PhD  
20  
21

22  
23 Hospital Israelita Albert Einstein  
24 Sao Paulo, SP - Brazil  
25

26  
27 **Corresponding Author:**

28 Nelson Astur, MD, MSc  
29 Hospital Israelita Albert Einstein  
30 Bloco A1 – Sala 306  
31 Av. Albert Einstein, 627  
32 Morumbi - CEP 05652- 900  
33 Sao Paulo, SP – Brazil  
34 [nelson.astur@einstein.br](mailto:nelson.astur@einstein.br)  
35 +55 11 21519393  
36

37  
38 **Funding statement:** This work will be supported by FAPESP (Fundação de  
39 Amparo à Pesquisa do Estado de São Paulo) grant number 2016/15830-7  
40

41 **Competing interests statement:** Authors have no potential conflict of interests.  
42

43  
44 **Ethical approval:** CAAE 65102617.2.0000.0071 / Hospital approval 2998-17  
45  
46  
47  
48  
49  
50  
51  
52  
53  
54  
55  
56  
57  
58  
59  
60

## ABSTRACT

### Introduction

Low back pain and vertebral endplate abnormalities are common conditions within the population. Subclinical infection caused by indolent pathogens can potentially lead to these findings, with differentiation between them notably challenging from a clinical perspective. Progressive infection of the intervertebral disc has been extensively associated with increasing low back pain, with *Propionibacterium acnes* specifically implicated with relation to sciatica. The main purpose of this study is to identify if the presence of an infective pathogen within the intervertebral disc is primary or is a result of intraoperative contamination, and whether this correlates to low back pain.

### Methods and analysis

An open prospective cohort study will be performed. Subjects included within the study will be between the ages of 18 to 65 years, and have a diagnosis of lumbar disc herniation requiring open decompression surgery. Excised herniated disc fragments, muscle and ligamentum flavum samples will be collected during surgery and sent to microbiology for tissue culture and pathogen identification. Score questionnaires for pain, functionality and quality of life will be given preoperatively and at 1, 3, 6 and 12 months postoperatively. A MRI will be performed 12 months after surgery for analysis of Modic changes and baseline comparison. The primary endpoint is the rate of disc infection in symptomatic patients with degenerative disc disease. The secondary endpoints will be performance scores, Modic incidence and volume.

### Ethics and dissemination

This study was approved by our Institutional Review Board and was only initiated after it (CAAE 65102617.2.0000.0071). Patients agreeing to participate will sign an Informed Consent Form before entering the study. Results will be published in a peer reviewed medical journal irrespective of study findings. If shown to be the case, this would have profound effects on the way physicians treat chronic low back pain, even impacting health costs.

**Registration** ClinicalTrials.gov NCT0315876

## INTRODUCTION

Low back pain and vertebral endplate abnormalities are common conditions within the population, with Modic et al.<sup>1,2</sup> reporting endplate abnormality rates of up to 6% within the population and 46% of patients complaining of low back pain<sup>3</sup>. Modic type I changes are described as vertebral bone marrow edema related to acute low back pain<sup>4</sup>. When Modic changes are detected, there is a 4.5 times higher incidence of nonspecific low back pain on presentation<sup>1,2</sup>.

Subclinical infection caused by low-virulence pathogens can potentially lead to vertebral endplate abnormalities, which are identified through magnetic resonance imaging (MRI). Differentiation between subclinical infection and Modic changes may be notably difficult, given the paucity of examination findings<sup>5,6</sup>. Additionally, subclinical infections can be associated with increasing low back pain<sup>7</sup>. Albert et al.<sup>8</sup> reported 61 patients who had undergone surgical treatment for lumbar disc herniation, with 46% of cases showing a positive culture. The same authors also reported that 80% of the patients with a positive culture for anaerobic pathogens presented with Modic type I changes at the adjacent vertebra after a two-year follow-up. This is in stark contrast to only 44% of patients with negative culture. Some studies demonstrated the presence of low-virulence pathogens in intervertebral disc tissue cultures<sup>6-10</sup>, with the most common causative organism reported as *Propionibacterium acnes*.

Chronic low back pain and Modic type I changes have been treated with antibiotics for up to 100 days with superior outcomes in comparison to placebo treatment according to Albert et al.<sup>7</sup>. In this study, patients were treated with amoxicillin/clavulanate (500mg/125mg)<sup>7</sup> following another study where *Propionibacterium acnes* was linked to sciatica<sup>8</sup>. However, Carricajo et al.<sup>11</sup> suggest that the presence of *P. acnes* in the intervertebral discs is due to either external surgical or laboratory contamination. Within their study, they detected positive disc cultures in only 3.7% of 54 patients. Further, the same group demonstrated that samples of spinal muscle and ligamentum *flavum* had positive cultures in 14.8% of cases that had negative disc cultures. Reinforcing the findings of this study, Rigal et al.<sup>12</sup> analysed a sample of 313 patients undergoing video-assisted or retroperitoneal anterior approach, and found only six cases of positive cultures. No correlation between infection and degeneration of the intervertebral disc was found. Contrastingly, Rollason et al.<sup>13</sup>, in a study of genotype characterization, observed that *P. acnes* cultured from disc samples surgically resected from 64 patients with disc herniation were different from those normally colonizing the skin, suggesting that this variant of the *P. acnes* bacterium could be related to low back pain. A systematic review performed by Urquhart et al.<sup>14</sup> concluded that there is moderate evidence of a relationship between positive *P. acnes* cultures with Modic type I changes and low back pain, although the evidence was not substantive. The group concluded that new studies should be conducted to determine whether pathogens within the vertebral disc arise from external contamination or if they are truly implicated in the development of chronic back pain (low back pain for at least three months).

## HYPOTHESIS AND OBJECTIVES

1  
2  
3 We hypothesise that lumbar disc herniation is related to subclinical  
4 infection of the intervertebral disc

5 Our primary end point of this study is to identify whether the presence of  
6 a pathogen within the intervertebral disc is primary or if it is a result of  
7 intraoperative contamination.

8 The secondary end points are to analyse clinical prognostic factors in  
9 patients and the diagnosis of infection. The study also proposes to analyse the  
10 relationship between radiological changes (Modic I and II) and infection.

## 11 12 13 **JUSTIFICATION AND SCIENTIFIC CHALLENGES**

14  
15 If there is a confirmation of a relationship between subclinical pathogens,  
16 lumbar disc herniation and Modic changes with nonspecific chronic back pain,  
17 this will change the way this disease process is managed and improve treatment  
18 costs and patient outcomes.

19  
20 Previously published studies that report a strong correlation between *P.*  
21 *acnes* and low back pain and/or disc herniation are almost entirely from the  
22 same study group<sup>5-8</sup>. Few studies have questioned their results, and those that  
23 have, only presented small sample groups and inadequate statistical  
24 methodologies<sup>11</sup>. For this prospective cohort study, we previously calculated the  
25 minimum number of subjects needed for adequate statistical analysis. Aside  
26 from outlining a specific culturing method for *P. acnes*, this project addresses  
27 molecular analysis and clinical outcomes follow up in a single study. This  
28 provides a complexity and significance that have not been achieved in previously  
29 published studies on the topic.

## 30 31 32 **METHODS AND ANALYSIS**

33  
34 This study protocol is registered at *Clinicaltrials.gov* under NCT0315876.  
35 [https://clinicaltrials.gov/ct2/show/NCT03158766?term=NCT03158766&rank=](https://clinicaltrials.gov/ct2/show/NCT03158766?term=NCT03158766&rank=1)  
36 [1](https://clinicaltrials.gov/ct2/show/NCT03158766?term=NCT03158766&rank=1)

37  
38 Institutional Review Board approval (CAAE 65102617.2.0000.0071)

### 39 40 41 **Study design:**

42 An open prospective cohort study will be performed at a single center,  
43 (Hospital Israelita Albert Einstein - HIAE) taking 1 year for recruiting, and  
44 ending 1 year after inclusion of last patient. Patients' data will be collected with a  
45 specific form created for this study. Patients will be summoned for a new  
46 magnetic resonance image of the lumbar spine one year after their surgical  
47 procedure.

48  
49 All included patients will go through further treatment of ten sessions of  
50 postoperative physical therapy. They will be instructed to maintain learned  
51 exercises in their residences. Pain medications will not be controlled and will  
52 follow attending physician prescriptions.

### 53 54 55 **Population:**

56 Patients will be consecutively included in the study.  
57  
58  
59  
60

- 1  
2  
3 - **Inclusion criteria:** Subjects between 18 and 65 years of age; both  
4 genders; diagnosis of lumbar disc herniation and are undergoing open  
5 decompression surgery (microdiscectomy). Indication for surgery is  
6 sciatica caused by disc herniation compression of a lumbar nerve root  
7 failing conservative treatment for at least six weeks or on-going  
8 neurological deficit. Patients with history of previous spinal injection  
9 will not be excluded from the study. Patients willing and able to go  
10 through all phases of clinical investigation will be included. An  
11 Informed Consent Form (ICF) must be signed.  
12  
13 - **Exclusion criteria:** Patients with previous lumbar disc surgery at the  
14 same level at any point of life; patients undergoing chemotherapy;  
15 patients with any immune deficiency; patients previously submitted  
16 to disc injection and/or discography; patients submitted to previous  
17 endoscopic disc surgery; patients with fusion performed at the same  
18 stage of decompression surgery; patients with any other infection  
19 within the last six months or usage of antibiotics within the last two  
20 months; patients with incomplete specific form or data; decline to  
21 participate or sign the ICF.  
22  
23

#### 24 **Patient enrollment in the study:**

25 Evaluation of patient eligibility will be carried out by the main  
26 investigator or by a co-investigator. Both study coordinators will perform an  
27 interview with a candidate patient about his/her willingness to participate in the  
28 study. They will be responsible for confirming their eligibility with relation to the  
29 inclusion and exclusion criteria; and, if the patient accepts, the investigator will  
30 explain all study details and read along the ICF. Any questions regarding the  
31 objectives of the study, involved procedures, risks/benefits, and confidentiality  
32 will be resolved. Patients accepting to participation will date and sign the ICF. A  
33 copy of the form will be attached to the patient's medical record, and another  
34 will be provided to the patients themselves. After the ICF is properly signed, the  
35 patient will undergo an interview to complete the initial demographic data and  
36 pre-treatment forms. If the patient is unable to sign the written ICF, the  
37 investigator will vocally explain the study and the patient will provide oral  
38 consent in the presence of a witness that will sign the ICF. Patient recruitment  
39 will be carried out for 24 months, so that 95 patients shall be included (details of  
40 estimated  $n$  reported at sample size determination).  
41  
42  
43  
44

#### 45 **Patient allocation**

46 Patients will undergo surgery according to surgeons' preference.  
47 Attending surgeons will determine chosen operative technique according to  
48 their experience and preference.  
49

#### 50 **Blinding**

51 Neither the patient or attending physician will have access to the results  
52 of tissue cultures. The radiologist that will analyse the imaging studies of  
53 performed MRIs will also be blinded to the patient data and laboratory results. A  
54 blinded investigator will analyse pain and function scores.  
55  
56

#### 57 **Early stopping of participation in the study**

1  
2  
3 Patients will be excluded from the study upon:

- 4 - Withdrawal of ICF  
5 - Death  
6 - Patient selection flaw identified (incompatible eligibility  
7 criteria)  
8 - Lost to follow-up  
9 - Patient presents with clinical symptoms of infection, inclusive  
10 of severe lumbar or radicular pain, fever with no other  
11 detected foci, abnormal ESR/CRP/leucogram, altered imaging  
12 studies that leads to interruption of the blinding of the results  
13 of culture exams.  
14

15 For each excluded case, the reason and circumstance for the withdrawal  
16 will be detailed. Patient data collected until that point of the study will be  
17 included at final analysis.  
18

## 19 Selected endpoints

### 20 Primary endpoint

#### 21 - Rate of intervertebral disc infection

22 The primary objective of this study was to consider the  
23 incidence of intervertebral disc infection by any type of low  
24 virulence pathogen, with consequent Modic changes and  
25 chronic low back pain. Thus, the calculation of the incidence  
26 of infection in lumbar disc herniations will be performed.  
27

- 28 1. **Incidence of infection rate (IIR)** will be calculated  
29 as follows:  
30

$$31 \text{ IIR} = \frac{\text{(number of detected infections)}}{\text{(total number of included patients)}}$$

### 32 Secondary endpoint

#### 33 - Low back pain

34 Intensity of low back pain and limitation for daily activities  
35 of patients with and without infection will be analysed  
36 through the Numeric Rating Score (NRS) system applied at  
37 time of patient recruitment and 1, 3, 6 and 12 months after  
38 surgical procedure (Table 1). The clinically significant  
39 threshold will be considered to be an increase of 30% of  
40 baseline lumbar pain at the first postoperative month. NRS  
41 and the visual analogue scale (VAS) have good correlation  
42 and are equally sensitive to quantify postoperative pain<sup>15</sup>.  
43 Compared to VAS, NRS is easier to manage and codify,  
44 furthermore, less mistakes occur during data insertion<sup>16</sup>.  
45 Otherwise, it is easier to complete<sup>16</sup> and preferred by  
46 patients<sup>17</sup>.  
47

#### 48 - Quality of life

49 Quality of life at the end of one year for both infected and  
50 uninfected groups, with and without Modic changes, will be  
51 analysed through the validated Portuguese version of the  
52  
53  
54  
55  
56  
57  
58  
59  
60

EuroQol (EQ-5D) questionnaire. This measurement tool will be applied at timing of patient recruitment, and 1, 3, 6 and 12 months after surgery.

EQ-5D is a self-completing standardized tool containing 5 items (mobility, self-care, usual activities, pain/discomfort, and anxiety/depression). Compared to the Short-Form 36 (SF-36) questionnaire, EQ-5D is a shorter and faster form to analyse.

**- Function**

Function will be quantified through the Portuguese version of the Oswestry Disability Index (ODI) for lumbar pain that will be applied at time of recruitment and 1, 3, 6 and 12 months after surgery.

**- Modic incidence**

Insurgent Modic changes in patients will be analysed one year after surgery, as well as its relationship with presence or absence of infection.

Incidence of Modic (IM) changes will be calculated for the infection group (IM infec) and for the total group (IM total) as follows:

$$\text{IM infec} = \frac{\text{(number of Modic changes in infected patients after 1 year)}}{\text{(total number of infections)}}$$

$$\text{IM total} = \frac{\text{number of Modic changes at final 1 year follow-up}}{\text{total number of patients}}$$

**- Volume and size of Modic changes, additional imaging analysis**

Quantification of sizing will be done by two radiologists with expertise in musculoskeletal diagnosis. All images will be analysed in sagittal T1, T2, and FAT-T2 weight sequences of the lumbar spine in DICOM format. Modic volume will be measured according to Wang et al<sup>18</sup>. Three sagittal slices of the lumbar spine will be considered: midsagittal slice; left pedicle parasagittal slice; and right pedicle parasagittal slice. The parameters examined to quantify Modic changes will include measures of ratios of the region affected by Modic changes to the entire corresponding vertebral body, including maximal width ratio, maximal height ratio, and area ratio. Vertebral body changes will be classified accordingly to Modic changes type I, II, and III<sup>1,2</sup>. Soft tissues around the vertebra, such as disc,



1  
2  
3 muscles, and ligaments will also be analysed. Data will be  
4 collected for presence of vertebral or disc edema, and  
5 presence of disc hydration or not. Disc degeneration will be  
6 collected as: normal; degeneration with height  
7 preservation; and, degeneration with loss of height. Preop  
8 and 12-month postop acquired MRI studies will be  
9 compared. Both superior and inferior disc endplates will be  
10 evaluated and compared. Preoperative study will be taken  
11 as baseline for comparative purposes.

12  
13  
14 - **Adverse effects**

15 Fail of surgical treatment (recurrence, instability, need for  
16 reoperation, etc.); need for additional physical therapy  
17 sessions; superficial infection; drainage; deep venous  
18 thrombosis; and, any other possible adverse event that may  
19 show up will be included as well.  
20  
21

22  
23 **Study stages**

24  
25 **Sample collection:**

26 Included patients will undergo standard fashion general anesthesia and  
27 prepped with chlorhexidine solution. Intravenous antibiotics prophylaxis will be  
28 administered within first hour before skin incision, according to standard  
29 protocol of HIAE Infection Control Committee published at the hospital  
30 Pharmaceutics Manual.  
31

32 Preoperative blood sample will be collected for leucogram, ESR, and CRP.  
33 Same laboratory will be repeated at 1, 6 and 12 months time-point (Table 1).  
34

35 The excised herniated disc fragment will be immediately sent to  
36 microbiology laboratory analysis in a universal sterile container (screw cap  
37 tube) in no more than 30 minutes to be processed as follows. The same process  
38 will be applied to samples of deep muscle and ligamentum flavum at the end of  
39 the surgical procedure. Three cultures of the intervertebral disc will be done, as  
40 well as three of the ligamentum flavum and three of the multifidus muscle for  
41 each patient. The flowchart of this stage is described in Figure1. Search for  
42 pathogens protocol is similar to the one proposed by Levy et al<sup>19</sup>, although due to  
43 the avascular nature of the intervertebral disc, we will inoculate the sonication  
44 fluid (after sample concentration) in blood cultures bottles (automated system)  
45 to improve the recovery of pathogens and reduce contamination.  
46  
47

48 **Search for pathogens:**

49 The herniated intervertebral disc will be split equally into three  
50 fragments of 2x2x5 mm and flattened in a laminar flow cabinet until a  
51 homogenous material is achieved. The same process will be carried out for the  
52 samples of ligamentum flavum and multifidus. Tissues will be cultured in specific  
53 growth medium and incubated according to the respective culture:  
54

55 Similar criteria used by the Infectious Diseases Society of America (IDSA)  
56 to detect joint replacement infection will be adopted, which is the  
57 recommendation on at least two positive tissue cultures by the same pathogen to  
58  
59  
60

1  
2  
3 confirm diagnosis of infection<sup>20</sup>. This same criterion was already adopted in a  
4 study to characterize isolated pathogens in herniated intervertebral discs<sup>14</sup>.  
5  
6

7  
8  
9  
10  
11  
12  
13  
14  
15  
16  
17  
18  
19  
20  
21  
22  
23  
24  
25  
26  
27  
28  
29  
30  
31  
32  
33  
34  
35  
36  
37  
38  
39  
40  
41  
42  
43  
44  
45  
46  
47  
48  
49  
50  
51  
52  
53  
54  
55  
56  
57  
58  
59  
60

**- A - Aerobic culture**

For aerobic cultures, samples will be cultured in 5% sheep blood agar, chocolate agar and MacConkey agar plate, and will be placed in a 35°C incubator (CO<sub>2</sub> atmosphere) for 5 days. If a positive bacteria culture is detected in the plate, the colony will be identified by MALDI TOF (Matrix Assisted Laser Desorption Ionization-Time of Flight) Microflex LT (Bruker Daltonics/BD). Sensitivity profile will be performed when needed, according to CLSI (Clinical Laboratory Standards Institute) recommendations.

**- B - Anaerobic culture**

For anaerobic culture, tissue will be cultured in a Thioglycolate tube and incubated in a 35°C incubator for up to 14 days. If turbidity occurs at the Thioglycolate medium, material will be cultured in anaerobic blood agar and incubation at 35°C will be done in an anaerobic atmosphere. After growing of colonies, identification will be done by MALDI TOF and, when necessary, a sensitivity test to antibiotics will be performed according to CLSI recommendations.

**- C - Histological analysis**

Anatomic pathology analysis of the remaining fragment of the herniated disc (2x2x5mm) will be completed. The sample will be transported in a universal container with tamponated formalin (10%), followed by dehydration in alcohol diafanized in xylol and inclusion in paraffin (60-65°C), which will be stained in hematoxylin-eosin (HE) and GRAM staining.

- **HE:** Histological cuts of 4µm will be performed, followed by clearing with xylol for 10 minutes twice, embedding with alcohol under increasing concentrations and stained with hematoxylin for 5 minutes, running water for 5 minutes, eosin for 1 minute and running water for 2 minutes followed by assembly of glass microscope slide with Entellan®.
- **GRAM:** Another slide will be embedded with crystal violet for 1 minute, running water for 1 minute followed by lugol for another 1 minute and additional wash with running water. Unstaining of the slide will be done with alcohol 95% for 10 seconds followed by running water and then, stain with fuchsine for 30 seconds, running water wash again, drying and slide assembly with Entellan®.

### - D – Molecular analysis of pathogens

Positive cultures that present aerobic or anaerobic pathogens culturing, will be isolated and stowed refrigerated in -80°C freezer for posterior molecular analysis.

Molecular typing will be performed through Pulsed Field Gel Electrophoresis technique of isolated samples according to the protocol described by Oprica et al.<sup>21</sup> using Spe-I restriction enzyme and Bionumerics software for analysis of results.

### Questionnaires

Scores for pain (NRS), function (ODI), and quality of life (EQ-5D) will be self assessed and applied before surgery and at 1, 3, 6 and 12 months time-points. All questionnaires will be collected by a employee not involved in the study. Follow-up clinic visits will be at 1, 3, 6 and 12 months after surgical procedure, with acceptance deviation of 7, 14, 21, and 28 days, respectively (Table 1).

### Imaging studies

Magnetic resonance imaging studies will be performed in Siemens or General Electric 1.5T devices. Studies in 3.0T devices will not be done due to higher frequency of artifacts generated by chemical shift, which would modify measurements of Modic changes.

The following sequences will be used:

- Sagittal cut: Fast Spin-Echo T1 and T2 weighted with fat suppression or STIR instead of T2, according to our institution protocol established for all exams
- Coronal cut: same sequence imaging will be used for measurements.

At follow-up, contrasted MRI studies of patients will be done as an institution established protocol for postoperative patients, otherwise, it will not interfere with the study protocol.

Lumbar disc herniation will be diagnosed through MRI in eligible patients. Included patients will be submitted to new MRI 12 months after surgery.

Two radiologists with expertise in musculoskeletal MRI will independently classify and perform measurements, and divergences will be solved blindly by common opinion.

### Confounding variables

Data on the following confounding variables will be collected: age, gender, alcohol intake, smoking, body mass index (BMI), spinal injections with corticoid within 6 months before surgery, usage of oral corticoids up to 3 months before surgery, diabetes.

Since this information may change over time, data will be considered at time of last assessment before surgery.

1  
2  
3 **A - Alcohol intake:** categorized as - none or sporadically (<1 glass/day); light  
4 intake (1-2 glass/day); moderate/heavy intake (3 or more glasses/day); and, not  
5 assessed<sup>22</sup>.

6 **B - Smoking:** categorized as - ex-smokers; smoker; non-smoker; and, not  
7 assessed<sup>23</sup>.

8 **C - BMI:** categorized as - underweight (<18.5); normal weight (18.5-25);  
9 overweight (25-30); obese (>30); not assessed or not available<sup>24</sup>.

## 11 **ETHICS AND DISSEMINATION**

12 This study started only after approval of our Institutional Review Board  
13 (IRB) (CAAE 65102617.2.0000.0071). Patients agreeing to participate will sign  
14 an Informed Consent Form before entering the study. Results will be published  
15 in a peer-reviewed medical journal and presented in medical conferences  
16 independently of study findings.

17 Some authors suggest that subclinical infection of the intervertebral disc  
18 is one of the causes of chronic low back pain unresponsive to treatment, besides  
19 promoting Modic type I changes on MRI. Although there are studies reporting  
20 relative success on treatment of well-selected patients, there is still uncertainty  
21 as to whether these patients were actually infected or not.

22 We hope to define the accurate incidence of subclinical infection of the  
23 intervertebral disc with disc herniation and provide data and possibly an answer  
24 to this present gap in the literature.

## 28 **STATISTICAL PLANNING**

29 Rate of subclinical infection (or Modic change) will be obtained by the  
30 ratio between number of positive cultures from surgical samples and total  
31 number of patients, and estimates will follow 95% confidence intervals. After  
32 infection cases are identified, we will investigate if there is an association  
33 between detected infection and patient outcomes by logistic regression models  
34 for Modic changes, ordinal logistic regression for Modic volume and size, and  
35 linear regression or general linear models for numeric outcomes, such as: low  
36 back pain, quality of life and function. All models will consider confounding  
37 variables such as: smoking and alcohol intake, diabetes, corticosteroids injection,  
38 BMI, gender, and age. Results will be presented as effects estimates such as odds  
39 ratio or mean ratio, 95% confidence intervals and *p* values. Study dropout cases,  
40 for any reason, will be considered for final analysis.

### 44 *Sample size calculation*

45 Sample size was calculating to estimate the incidence of subclinical  
46 infection in patients with lumbar disc herniation. Considering that the rate of  
47 infection lies around 46%<sup>3</sup>, we need to observe a minimum of 95 patients to  
48 achieve a 95% confidence interval with 10% absolute accuracy.

49 The necessary sample size required for analysis of the secondary  
50 endpoints will depend on the observed rate of cases with subclinical infection in  
51 our study sample. If the observed rate is too small, an increase in the number of  
52 included patients will be needed. To better evaluate this, the sample size  
53 calculation will be revisited by the time we have reached half of initially planned  
54 sample size (48 patients).

**CHRONOGRAM**

At the end of the protocol (Table 1)

**FUNDING STATEMENT**

This work was supported by Fundação de Amparo à Pesquisa do Estado de São Paulo (FAPESP) grant number 2016/15830-7.

**COMPETING INTERESTS STATEMENT**

Authors have no potential conflict of interests.

**AUTHORS CONTRIBUTIONS**

**Nelson Astur** – Spine surgeon – Conception and design of the work, data collection, data analysis and interpretation, drafting the article

**Delio E. Martins** – Spine surgeon – Conception and design of the work, data collection, data analysis and interpretation, critical revision of the article, final approval of the version to be published

**Marcelo Wajchenberg** – Spine surgeon – Data collection, critical revision of the article, final approval of the version to be published

**Mario Ferreti** – Orthopedic surgeon – Critical revision of the article, final approval of the version to be published

**Fernando G. Menezes** – Infectologist – Conception and design of the work, final approval of the version to be published

**Andre M. Doi** – Microbiologist – Conception and design of the work, data collection, data analysis and interpretation

**Laercio A. Rosemberg** – Radiologist – Design of the work, data analysis and interpretation, data collection

**Durval C. B. Santos** – Radiologist – Design of the work, data analysis and interpretation, data collection

**Alexandre S. Yutaka** – Spine surgeon – Data collection, critical revision of the article

**Luciano M. R. Rodrigues** – Spine surgeon – Data collection, critical revision of the article

**Marines D. V. Martino** – Microbiologist – Data collection, critical revision

**Jorge R. Pagura** - Spine surgeon – Data collection, critical revision of the article

**Eduardo N. Kihara Filho** - Radiologist – Design of the work, data analysis and interpretation, data collection

**Mario Lenza** – Orthopedic surgeon – Conception of the work, critical revision of the article, final approval of the version to be published

## References

1. Modic, MT, Steinberg, PM, Ross, JS, Masaryk, TJ, Carter, JR: Degenerative disk disease: assessment of changes in vertebral body marrow with MR imaging. *Radiology* 1988;166:193–199.
2. Modic, MT, Masaryk, TJ, Ross, JS, Carter, JR: Imaging of degenerative disk disease. *Radiology* 1988;168:177–86.
3. Jensen, TS, Karppinen, J, Sorensen, JS, Niinimäki, J, Leboeuf-Yde, C: Vertebral endplate signal changes (Modic change): A systematic literature review of prevalence and association with non-specific low back pain. *Eur Spine J* 2008;17:1407–1422.
4. Toyone, T, Takahashi, K, Kitahara, H, Yamagata, M, Murakami, M, Moriya, H: Vertebral bone-marrow changes in degenerative lumbar disc disease. An MRI study of 74 patients with low back pain. *J Bone Joint Surg Br* 1994;76:757–764.
5. Albert, HB, Kjaer, P, Jensen, TS, Sorensen, JS, Bendix, T, Manniche, C: Modic changes, possible causes and relation to low back pain. *Med Hypotheses* 2008;70:361–368.
6. Ohtori, S, Koshi, T, Yamashita, M, Yamauchi, K, Inoue, G, Suzuki, M, Takaso, M, Orita, S, Eguchi, Y, Ochiai, N, *et al.*: Existence of pyogenic spondylitis in Modic type 1 change without other signs of infection: 2-year follow-up. *Eur Spine J* 2010;19:1200–1205.
7. Albert, HB, Sorensen, JS, Christensen, BS, Manniche, C: Antibiotic treatment in patients with chronic low back pain and vertebral bone edema (Modic type 1 changes): A double-blind randomized clinical controlled trial of efficacy. *Eur Spine J* 2013;22:697–707.
8. Albert, HB, Lambert, P, Rollason, J, Sorensen, JS, Worthington, T, Pedersen, MB, Norgaard, HS, Vernallis, A, Busch, F, Manniche, C, *et al.*: Does nuclear tissue infected with bacteria following disc herniations lead to Modic changes in the adjacent vertebrae? *Eur Spine J* 2013;22:690–696.
9. Stirling, A, Worthington, T, Rafiq, M, Lambert, PA, Elliott, TSJ: Association between sciatica and *Propionibacterium acnes*. *Lancet* 2001;357:2024–2025.
10. Agarwal, V, Golish, SR, Alamin, TF: Bacteriologic culture of excised intervertebral disc from immunocompetent patients undergoing single level primary lumbar microdiscectomy. *J Spinal Disord Tech* 2011;24:397–400.
11. Carricajo, A, Nuti, C, Aubert, E, Hatem, O, Fonsale, N, Mallaval, FO, Vautrin, AC, Brunon, J, Aubert, G: *Propionibacterium acnes* contamination in lumbar disc surgery. *J Hosp Infect* 2007;66:275–277.
12. Rigal, J, Thelen, T, Byrne, F, Cogniet, A, Boissière, L, Aunoble, S, Le Huec, J-C: Prospective study using anterior approach did not show association between Modic 1 changes and low grade infection in lumbar spine. *Eur Spine J* 2016;25:1000–1005.
13. Rollason, J, McDowell, A, Albert, HB, Barnard, E, Worthington, T, Hilton, AC, Vernallis, A, Patrick, S, Elliott, T, Lambert, P: Genotypic and antimicrobial characterisation of *propionibacterium acnes* isolates from surgically excised lumbar disc herniations. *Biomed Res Int* 2013;2013:
14. Urquhart, DM, Zheng, Y, Cheng, AC, Rosenfeld, J V, Chan, P, Liew, S, Hussain, SM, Cicuttini, FM: Could low grade bacterial infection contribute to low

- 1  
2  
3 back pain? A systematic review. *BMC Med* 2015;13:13.
- 4 15. Breivik, H, Borchgrevink, PC, Allen, SM, Rosseland, LA, Romundstad, L,  
5 Breivik Hals, EK, Kvarstein, G, Stubhaug, A: Assessment of pain. *Br J*  
6 *Anaesth* 2008;101:17-24.
- 7 16. Ritter, PL, González, VM, Laurent, DD, Lorig, KR: Measurement of pain  
8 using the visual numeric scale. *J Rheumatol* 2006;33:574-80.
- 9 17. Gagliese, L, Weizblit, N, Ellis, W, Chan, VWS: The measurement of  
10 postoperative pain: A comparison of intensity scales in younger and older  
11 surgical patients. *Pain* 2005;117:412-420.
- 12 18. Wang, Y, Videman, T, Niemelainen, R, Battie, MC, Niemeläinen, R, Battié,  
13 MC: Quantitative measures of modic changes in lumbar spine magnetic  
14 resonance imaging: intra- and inter-rater reliability. *Spine (Phila Pa 1976)*  
15 2011;36:1236-1243.
- 16 19. Levy, O, Iyer, S, Atoun, E, Peter, N, Hous, N, Cash, D, Musa, F, Narvani, AA:  
17 Propionibacterium acnes: an underestimated etiology in the pathogenesis  
18 of osteoarthritis? *J Shoulder Elb Surg* 2013;22:505-511.
- 19 20. Osmon, DR, Berbari, EF, Berendt, AR, Lew, D, Zimmerli, W, Steckelberg, JM,  
20 Rao, N, Hanssen, A, Wilson, WR, Infectious Diseases Society of America:  
21 Executive summary: diagnosis and management of prosthetic joint  
22 infection: clinical practice guidelines by the Infectious Diseases Society of  
23 America. *Clin Infect Dis* 2013;56:1-10.
- 24 21. Oprica, C, Emtestam, L, Lapins, J, Borglund, E, Nyberg, F, Stenlund, K,  
25 Lundeberg, L, Sillerström, E, Nord, CE: Antibiotic-resistant  
26 Propionibacterium acnes on the skin of patients with moderate to severe  
27 acne in Stockholm. *Anaerobe* 2004;10:155-164.
- 28 22. Alcohol drinking. IARC Working Group, Lyon, 13-20 October 1987. *IARC*  
29 *Monogr Eval Carcinog risks to humans* 1988;44:1-378.
- 30 23. IARC Working Group on the Evaluation of Carcinogenic Risks to Humans:  
31 Tobacco smoke and involuntary smoking. *IARC Monogr Eval Carcinog risks*  
32 *to humans* 2004;83:1-1438.
- 33 24. Reeves, GK, Pirie, K, Beral, V, Green, J, Spencer, E, Bull, D, Million Women  
34 Study Collaboration: Cancer incidence and mortality in relation to body  
35 mass index in the Million Women Study: cohort study. *BMJ*  
36 2007;335:1134.
- 37  
38  
39  
40  
41  
42  
43  
44  
45  
46  
47  
48  
49  
50  
51  
52  
53  
54  
55  
56  
57  
58  
59  
60

## Figure legends

Figure 1: Flowchart of collected clinical samples that will be sent to culture analysis.

Table 1: Chronogram of included patients

|                                                           | Screening/<br>Recruiting | Postop 4 weeks $\pm$ 7<br>days | Postop 3 months $\pm$<br>14 days | Postop 6 months $\pm$<br>21 days | Postop 12 months<br>$\pm$ 30 days |
|-----------------------------------------------------------|--------------------------|--------------------------------|----------------------------------|----------------------------------|-----------------------------------|
|                                                           | Visit 1                  | Visit 2                        | Visit 3                          | Visit 4                          | Visit 5                           |
| ICF                                                       | X                        |                                |                                  |                                  |                                   |
| Check including and excluding<br>criteria                 | X                        |                                |                                  |                                  |                                   |
| Collect demographic data                                  | X                        |                                |                                  |                                  |                                   |
| Investigate medical history /<br>Complete enrollment form | X                        |                                |                                  |                                  |                                   |
| Lab screening, ESR, CRP,<br>Leucogram                     | X                        | X                              |                                  | X                                | X                                 |
| Apply NRS tool                                            | X                        | X                              | X                                | X                                | X                                 |
| Apply Oswestry questionnaire                              | X                        | X                              | X                                | X                                | X                                 |
| Apply EQ-5D questionnaire                                 | X                        | X                              | X                                | X                                | X                                 |
| Physical therapy                                          |                          | X                              |                                  |                                  |                                   |
| Magnetic resonance imaging                                |                          |                                |                                  |                                  | X                                 |

ICF = Informed Consent Form; ESR = erythrocyte sedimentation rate; CRP = C reactive protein; NRS = Numeric rating scale; EQ-5D = European quality of life 5 dimensions.



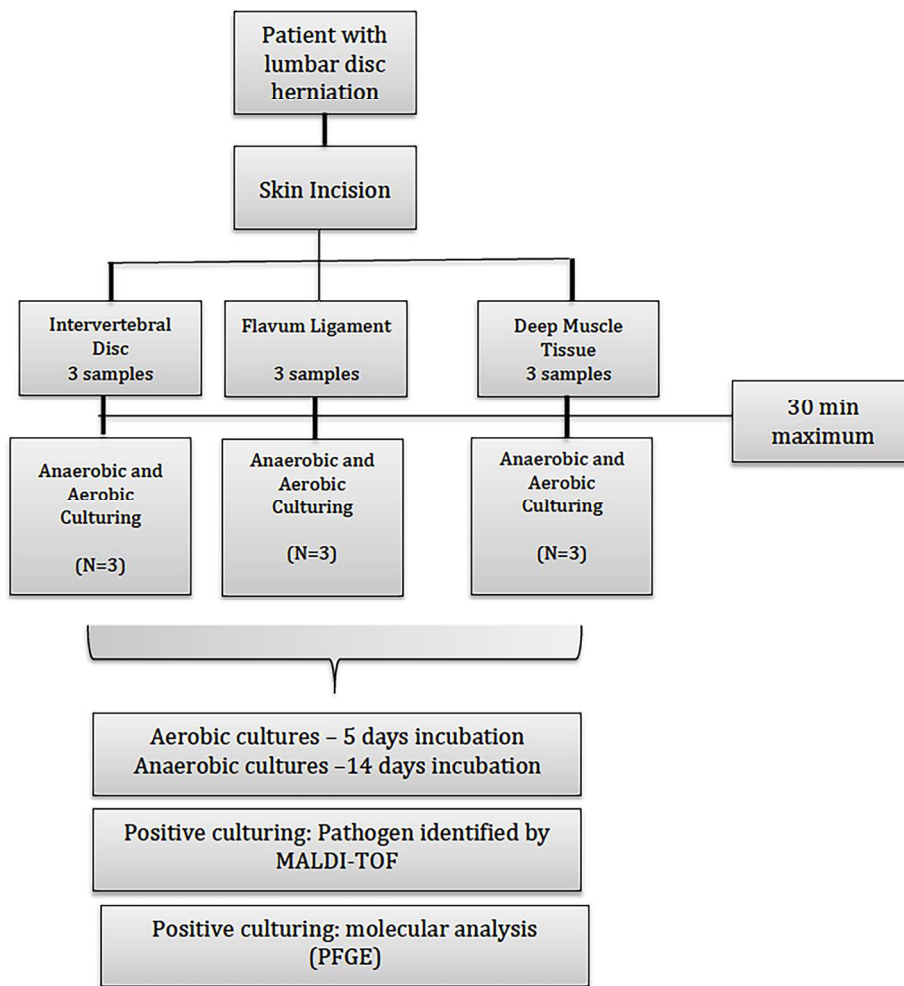

Flowchart of collected clinical samples that will be sent to culture analysis.

150x150mm (300 x 300 DPI)

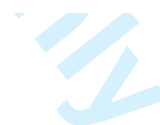

## STROBE Statement—checklist of items that should be included in reports of observational studies

|                              | Item No | Recommendation                                                                                                                                                                                                                                                                                                                                                                                                                                                                                                                                                                                                                                                                                                           |
|------------------------------|---------|--------------------------------------------------------------------------------------------------------------------------------------------------------------------------------------------------------------------------------------------------------------------------------------------------------------------------------------------------------------------------------------------------------------------------------------------------------------------------------------------------------------------------------------------------------------------------------------------------------------------------------------------------------------------------------------------------------------------------|
| <b>Title and abstract</b>    | 1       | (a) Indicate the study's design with a commonly used term in the title or the abstract <b>pg1</b><br>(b) Provide in the abstract an informative and balanced summary of what was done and what was found <b>attached to submission</b>                                                                                                                                                                                                                                                                                                                                                                                                                                                                                   |
| <b>Introduction</b>          |         |                                                                                                                                                                                                                                                                                                                                                                                                                                                                                                                                                                                                                                                                                                                          |
| Background/rationale         | 2       | Explain the scientific background and rationale for the investigation being reported <b>pg2</b>                                                                                                                                                                                                                                                                                                                                                                                                                                                                                                                                                                                                                          |
| Objectives                   | 3       | State specific objectives, including any prespecified hypotheses <b>pg3</b>                                                                                                                                                                                                                                                                                                                                                                                                                                                                                                                                                                                                                                              |
| <b>Methods</b>               |         |                                                                                                                                                                                                                                                                                                                                                                                                                                                                                                                                                                                                                                                                                                                          |
| Study design                 | 4       | Present key elements of study design early in the paper <b>pg3</b>                                                                                                                                                                                                                                                                                                                                                                                                                                                                                                                                                                                                                                                       |
| Setting                      | 5       | Describe the setting, locations, and relevant dates, including periods of recruitment, exposure, follow-up, and data collection <b>pg3-4</b>                                                                                                                                                                                                                                                                                                                                                                                                                                                                                                                                                                             |
| Participants                 | 6       | (a) <i>Cohort study</i> —Give the eligibility criteria, and the sources and methods of selection of participants. Describe methods of follow-up <b>pg3-4</b><br><i>Case-control study</i> —Give the eligibility criteria, and the sources and methods of case ascertainment and control selection. Give the rationale for the choice of cases and controls<br><i>Cross-sectional study</i> —Give the eligibility criteria, and the sources and methods of selection of participants<br>(b) <i>Cohort study</i> —For matched studies, give matching criteria and number of exposed and unexposed <b>N/A</b><br><i>Case-control study</i> —For matched studies, give matching criteria and the number of controls per case |
| Variables                    | 7       | Clearly define all outcomes, exposures, predictors, potential confounders, and effect modifiers. Give diagnostic criteria, if applicable <b>pg5-6</b>                                                                                                                                                                                                                                                                                                                                                                                                                                                                                                                                                                    |
| Data sources/<br>measurement | 8*      | For each variable of interest, give sources of data and details of methods of assessment (measurement). Describe comparability of assessment methods if there is more than one group <b>pg7-8</b>                                                                                                                                                                                                                                                                                                                                                                                                                                                                                                                        |
| Bias                         | 9       | Describe any efforts to address potential sources of bias <b>pg 9</b>                                                                                                                                                                                                                                                                                                                                                                                                                                                                                                                                                                                                                                                    |
| Study size                   | 10      | Explain how the study size was arrived at <b>pg 10</b>                                                                                                                                                                                                                                                                                                                                                                                                                                                                                                                                                                                                                                                                   |
| Quantitative variables       | 11      | Explain how quantitative variables were handled in the analyses. If applicable, describe which groupings were chosen and why <b>pg 9</b>                                                                                                                                                                                                                                                                                                                                                                                                                                                                                                                                                                                 |
| Statistical methods          | 12      | (a) Describe all statistical methods, including those used to control for confounding <b>pg 9</b><br>(b) Describe any methods used to examine subgroups and interactions <b>pg 9</b><br>(c) Explain how missing data were addressed <b>pg 4</b><br>(d) <i>Cohort study</i> —If applicable, explain how loss to follow-up was addressed <b>pg 4</b><br><i>Case-control study</i> —If applicable, explain how matching of cases and controls was addressed<br><i>Cross-sectional study</i> —If applicable, describe analytical methods taking account of sampling strategy<br>(e) Describe any sensitivity analyses                                                                                                        |

Continued on next page

**Results** PROTOCOL OF STUDY – NO RESULTS AVAILABLE

|                  |     |                                                                                                                                                                                                                                                                                                                                                                                                                                                                     |
|------------------|-----|---------------------------------------------------------------------------------------------------------------------------------------------------------------------------------------------------------------------------------------------------------------------------------------------------------------------------------------------------------------------------------------------------------------------------------------------------------------------|
| Participants     | 13* | (a) Report numbers of individuals at each stage of study—eg numbers potentially eligible, examined for eligibility, confirmed eligible, included in the study, completing follow-up, and analysed <b>PROTOCOL OF STUDY – NO RESULTS AVAILABLE</b><br>(b) Give reasons for non-participation at each stage <b>PROTOCOL OF STUDY – NO RESULTS AVAILABLE</b><br>(c) Consider use of a flow diagram <b>PROTOCOL OF STUDY – NO RESULTS AVAILABLE (Table 2)</b>           |
| Descriptive data | 14* | (a) Give characteristics of study participants (eg demographic, clinical, social) and information on exposures and potential confounders <b>PROTOCOL OF STUDY – NO RESULTS AVAILABLE</b><br>(b) Indicate number of participants with missing data for each variable of interest <b>PROTOCOL OF STUDY – NO RESULTS AVAILABLE</b><br>(c) <i>Cohort study</i> —Summarise follow-up time (eg, average and total amount) <b>PROTOCOL OF STUDY – NO RESULTS AVAILABLE</b> |
| Outcome data     | 15* | <i>Cohort study</i> —Report numbers of outcome events or summary measures over time <b>PROTOCOL OF STUDY – NO RESULTS AVAILABLE</b><br><i>Case-control study</i> —Report numbers in each exposure category, or summary measures of exposure<br><i>Cross-sectional study</i> —Report numbers of outcome events or summary measures                                                                                                                                   |
| Main results     | 16  | (a) Give unadjusted estimates and, if applicable, confounder-adjusted estimates and their precision (eg, 95% confidence interval). Make clear which confounders were adjusted for and why they were included <b>PROTOCOL OF STUDY – NO RESULTS AVAILABLE</b><br>(b) Report category boundaries when continuous variables were categorized<br>(c) If relevant, consider translating estimates of relative risk into absolute risk for a meaningful time period       |
| Other analyses   | 17  | Report other analyses done—eg analyses of subgroups and interactions, and sensitivity analyses <b>PROTOCOL OF STUDY – NO RESULTS AVAILABLE</b>                                                                                                                                                                                                                                                                                                                      |

**Discussion** PROTOCOL OF STUDY – NO DISCUSSION BASED ON RESULTS AVAILABLE

|                  |    |                                                                                                                                                                            |
|------------------|----|----------------------------------------------------------------------------------------------------------------------------------------------------------------------------|
| Key results      | 18 | Summarise key results with reference to study objectives                                                                                                                   |
| Limitations      | 19 | Discuss limitations of the study, taking into account sources of potential bias or imprecision. Discuss both direction and magnitude of any potential bias                 |
| Interpretation   | 20 | Give a cautious overall interpretation of results considering objectives, limitations, multiplicity of analyses, results from similar studies, and other relevant evidence |
| Generalisability | 21 | Discuss the generalisability (external validity) of the study results                                                                                                      |

**Other information**

|         |    |                                                                                                                                                                                     |
|---------|----|-------------------------------------------------------------------------------------------------------------------------------------------------------------------------------------|
| Funding | 22 | Give the source of funding and the role of the funders for the present study and, if applicable, for the original study on which the present article is based <b>pg 1 and pg 16</b> |
|---------|----|-------------------------------------------------------------------------------------------------------------------------------------------------------------------------------------|

\*Give information separately for cases and controls in case-control studies and, if applicable, for exposed and unexposed groups in cohort and cross-sectional studies.

**Note:** An Explanation and Elaboration article discusses each checklist item and gives methodological background and published examples of transparent reporting. The STROBE checklist is best used in conjunction with this article (freely available on the Web sites of PLoS Medicine at <http://www.plosmedicine.org/>, Annals of Internal Medicine at

1  
2  
3  
4  
5  
6  
7  
8  
9  
10  
11  
12  
13  
14  
15  
16  
17  
18  
19  
20  
21  
22  
23  
24  
25  
26  
27  
28  
29  
30  
31  
32  
33  
34  
35  
36  
37  
38  
39  
40  
41  
42  
43  
44  
45  
46  
47  
48  
49  
50  
51  
52  
53  
54  
55  
56  
57  
58  
59  
60

<http://www.annals.org/>, and Epidemiology at <http://www.epidem.com/>). Information on the STROBE Initiative is available at [www.strobe-statement.org](http://www.strobe-statement.org).

For peer review only
